# Supplementary material for: New Insights into the Crystal Chemistry of Elpidite, Na2Zr[Si6O15]·3H2O and (Na1+YCax□1−X−Y)Σ=2Zr[Si6O15]·(3−X)H2O, and Ab Initio Modeling of IR Spectra
Source: MDPI journal article supplement (doi:10.3390/ma14092160), 2021-04-23
Supplement: s1 [file s1]

# New insights into the crystal chemistry of elpidite, $\text{Na}_2\text{Zr}[\text{Si}_6\text{O}_{15}]\cdot 3\text{H}_2\text{O}$ and $(\text{Na}_{1+y}\text{Ca}_x\Box_{1-x-y})_{\Sigma=2}\text{Zr}[\text{Si}_6\text{O}_{15}]\cdot (3-x)\text{H}_2\text{O}$ , and *ab initio* modeling of IR spectra

Alexander Bogdanov<sup>1</sup>, Ekaterina Kaneva<sup>1,2\*</sup> and Roman Shendrik<sup>1</sup>

<sup>1</sup> Vinogradov Institute of Geochemistry, Siberian Branch of the Russian Academy of Sciences, 664033 Irkutsk, Russia; alex.bogdanov2012@gmail.com (A.B.) r.shendrik@gmail.com (R.S.)

<sup>2</sup> Department of Subsoil Use, Irkutsk National Research Technical University, 664074 Irkutsk, Russia

\* Correspondence: kev604@mail.ru

**Table S1.** Comparative crystallographic data for elpidite, previously published.

| Authors | Occurrence                         | Chemical Formula                                                                                                                                                                     | Unit Cell Parameters |              |              | Space Group |
|---------|------------------------------------|--------------------------------------------------------------------------------------------------------------------------------------------------------------------------------------|----------------------|--------------|--------------|-------------|
|         |                                    |                                                                                                                                                                                      | <i>a</i> (Å)         | <i>b</i> (Å) | <i>c</i> (Å) |             |
| [1,2]   | Lovozero, Kola Peninsula, Russia   | $\text{Na}_2\text{ZrSi}_6\text{O}_{15}\cdot 3\text{H}_2\text{O}$                                                                                                                     | 7.4                  | 14.4         | 7.05         | <i>Pbm2</i> |
| [3]     | Mont Saint Hilaire, Quebec, Canada | $\text{Na}_{1.04}\text{K}_{0.01}\text{Zr}_{1.05}\text{Si}_6\text{O}_{15}\cdot 3\text{H}_2\text{O}$                                                                                   | 7.14                 | 14.68        | 14.58        | <i>Pbmm</i> |
| [4]     | Mont Saint Hilaire, Quebec, Canada | $\text{Na}_2\text{ZrSi}_6\text{O}_{15}\cdot 3\text{H}_2\text{O}$                                                                                                                     | 7.14(2)              | 14.68(1)     | 14.65(1)     | <i>Pbcm</i> |
| [5]     | Khan-Bogdo, Mongolia               | $(\text{Na}_{1.31}\text{Ca}_{0.38}\text{K}_{0.03}\text{Mg}_{0.03})_{1.75}\text{ZrSi}_6\text{O}_{15}\cdot 2.9\text{H}_2\text{O}$                                                      | 7.31                 | 14.68        | 7.13         | <i>Pbm2</i> |
| [6]     | Lovozero, Kola Peninsula, Russia   | $(\text{Na}_{1.98}\text{K}_{0.01})(\text{Zr}_{1.02}\text{Nb}_{0.03}\text{Hf}_{0.01})(\text{Si}_{5.92}\text{Al}_{0.02})\text{O}_{15}\cdot 3.28\text{H}_2\text{O}$                     | 7.1136(1)            | 14.6764(2)   | 14.5977(2)   | <i>Pbcm</i> |
| [7]     | Khan-Bogdo, Mongolia               | $\text{Na}_{1.65}\text{Ca}_{0.15}\text{K}_{0.01}(\text{H}_{0.03})\text{ZrSi}_6\text{O}_{15}\cdot n\text{H}_2\text{O}$ , where $n \approx 3$ .                                        | 7.131(1)             | 14.685(1)    | 14.635(2)    | <i>Pbcm</i> |
| [8]     | Khan-Bogdo, Mongolia               | —                                                                                                                                                                                    | 7.1320(2)            | 14.6787(4)   | 14.6297(3)   | <i>Pbcm</i> |
| [9]     | Narssarssuk, Greenland             | $\text{Na}_2\text{ZrSi}_6\text{O}_{15}\cdot 3\text{H}_2\text{O}$                                                                                                                     | 7.14                 | 14.68        | 14.65        | <i>Pbcm</i> |
| [10]    | Mont Saint Hilaire, Quebec, Canada | $\text{Na}_{1.96}\text{ZrSi}_{5.97}\text{O}_{15}\cdot 2.9\text{H}_2\text{O}$                                                                                                         | 7.1134(1)            | 14.6796(2)   | 14.6030(2)   | <i>Pbcm</i> |
| [11]    | Lovozero, Kola Peninsula, Russia   | $(\text{Na}_{1.98}\text{K}_{0.01})(\text{Zr}_{1.02}\text{Nb}_{0.03}\text{Hf}_{0.01})(\text{Si}_{5.92}\text{Al}_{0.02})\text{O}_{15}\cdot 3.40\text{H}_2\text{O}$                     | 14.6127(7)           | 7.3383(4)    | 7.1148(3)    | <i>Pma2</i> |
| [12]    | Lovozero, Kola Peninsula, Russia   | —                                                                                                                                                                                    | 7.0956(5)            | 14.6536(6)   | 14.5696(7)   | <i>Pbcm</i> |
| [13]    | Khibiny, Kola Peninsula, Russia    | $(\text{Na}_{1.05}\text{K}_{0.08}\text{Ca}_{0.01})(\text{H}_3\text{O})_{0.74}(\text{Zr}_{0.89}\text{Ti}_{0.10}\text{Nb}_{0.03})\text{Si}_6\text{O}_{15}\cdot 3.47\text{H}_2\text{O}$ | 14.5916(6)           | 7.3294(3)    | 7.1387(2)    | <i>Pma2</i> |

**Table S2.** Crystallographic coordinates, occupancies and equivalent/isotropic atomic displacement parameters ( $\text{\AA}^2$ ) of elpidite sample EIB-1.

| Site | x/a        | y/b        | z/c        | Occ.     | Ueq    |
|------|------------|------------|------------|----------|--------|
| Zr   | 0.49564(6) | 0.25       | 0.5        | 1.035(3) | 0.0084 |
| Si1  | 0.7721(1)  | 0.38579(5) | 0.64609(6) | 1.00(6)  | 0.0096 |
| Si2  | 0.5077(1)  | 0.04737(4) | 0.64171(4) | 1.00(6)  | 0.0093 |
| Si3  | 0.2187(1)  | 0.39216(5) | 0.64406(6) | 1.00(6)  | 0.0087 |
| O1   | 0.9945(3)  | 0.4042(1)  | 0.6392(1)  | 1.00(7)  | 0.0156 |
| O2   | 0.7179(4)  | 0.3550(2)  | 0.75       | 1.0(1)   | 0.0148 |
| O3   | 0.7079(3)  | 0.3090(2)  | 0.5771(2)  | 1.00(7)  | 0.0139 |
| O4   | 0.6764(3)  | 0.4840(2)  | 0.6255(2)  | 1.00(8)  | 0.0164 |
| O5   | 0.5251(4)  | 0.0712(2)  | 0.75       | 1.0(1)   | 0.0156 |
| O6   | 0.4905(4)  | 0.1406(1)  | 0.5883(1)  | 1.00(7)  | 0.0152 |
| O7   | 0.3055(3)  | 0.4899(1)  | 0.6117(2)  | 1.00(7)  | 0.0134 |
| O8   | 0.2838(4)  | 0.3766(2)  | 0.75       | 1.0(1)   | 0.0129 |
| O9   | 0.2904(3)  | 0.3097(2)  | 0.5828(2)  | 1.00(7)  | 0.0151 |
| Na1  | 0.4424(3)  | 0.2315(1)  | 0.75       | 1.014(9) | 0.0332 |
| Na2  | −0.0045(3) | 0.25       | 0.5        | 0.990(7) | 0.0213 |
| Ow1  | 0.0094(4)  | 0.1130(2)  | 0.5811(2)  | 0.995(8) | 0.0308 |
| Ow2  | 0.1225(7)  | 0.1889(3)  | 0.75       | 1.03(1)  | 0.0474 |

**Table S3.** Anisotropic atomic displacement parameters ( $\text{\AA}^2$ ) of elpidite sample EIB-1.

| Site | U11       | U22       | U33       | U23        | U13        | U12        |
|------|-----------|-----------|-----------|------------|------------|------------|
| Zr   | 0.0082(1) | 0.0079(1) | 0.0090(1) | −0.0002(1) | 0.0000     | 0.0000     |
| Si1  | 0.0065(3) | 0.0107(3) | 0.0116(5) | −0.0010(3) | −0.0004(3) | 0.0003(2)  |
| Si2  | 0.0090(2) | 0.0084(2) | 0.0106(2) | 0.0012(2)  | −0.0001(4) | 0.0003(3)  |
| Si3  | 0.0064(3) | 0.0096(3) | 0.0102(4) | −0.0013(3) | 0.0001(3)  | 0.0000(2)  |
| O1   | 0.0076(6) | 0.0194(8) | 0.0198(8) | −0.0004(6) | 0.001(1)   | −0.0012(9) |
| O2   | 0.014(1)  | 0.019(2)  | 0.011(1)  | 0.0000     | 0.0000     | −0.004(1)  |
| O3   | 0.0131(9) | 0.0155(9) | 0.013(1)  | −0.0053(9) | −0.0043(9) | −0.0001(8) |
| O4   | 0.0137(9) | 0.0122(9) | 0.023(1)  | 0.0025(9)  | 0.0027(2)  | 0.0028(7)  |
| O5   | 0.021(2)  | 0.014(1)  | 0.012(1)  | 0.0000     | 0.0000     | 0.001(1)   |
| O6   | 0.0155(8) | 0.0112(7) | 0.0190(7) | 0.0048(6)  | 0.002(1)   | 0.0007(9)  |
| O7   | 0.0136(9) | 0.0119(2) | 0.0147(9) | 0.0019 (7) | −0.0033(7) | −0.0031(7) |
| O8   | 0.013(1)  | 0.015(1)  | 0.011(1)  | 0.0000     | 0.0000     | 0.001(1)   |
| O9   | 0.0136(9) | 0.0135(9) | 0.018(1)  | −0.0019(9) | 0.002(1)   | 0.0023(8)  |
| Na1  | 0.037(1)  | 0.0156(9) | 0.047(1)  | 0.0000     | 0.0000     | 0.0059(7)  |
| Na2  | 0.0162(7) | 0.0210(7) | 0.0269(8) | −0.0014(7) | 0.0000     | 0.0000     |
| Ow1  | 0.027(1)  | 0.025(1)  | 0.041(1)  | 0.009(1)   | −0.003(1)  | −0.005(1)  |
| Ow2  | 0.055(3)  | 0.048(3)  | 0.040(2)  | 0.0000     | 0.0000     | −0.018(2)  |

**Table S4.** Crystallographic coordinates, occupancies and equivalent/isotropic atomic displacement parameters ( $\text{\AA}^2$ ) of elpidite sample EIB-2.

| Site | x/a        | y/b        | z/c        | Occ.     | Ueq    |
|------|------------|------------|------------|----------|--------|
| Zr   | 0.49571(5) | 0.25       | 0.5        | 1.036(3) | 0.0087 |
| Si1  | 0.7722(1)  | 0.38596(5) | 0.64607(6) | 1.00(6)  | 0.0093 |
| Si2  | 0.5073(1)  | 0.04735(4) | 0.64167(4) | 1.00(7)  | 0.0093 |
| Si3  | 0.2186(1)  | 0.39210(5) | 0.64403(6) | 1.00(6)  | 0.0094 |

|     |            |           |           |          |        |
|-----|------------|-----------|-----------|----------|--------|
| O1  | 0.9947(3)  | 0.4041(1) | 0.6391(1) | 1.00(8)  | 0.0162 |
| O2  | 0.7187(4)  | 0.3553(2) | 0.75      | 1.0(1)   | 0.0156 |
| O3  | 0.7084(3)  | 0.3092(2) | 0.5770(2) | 1.00(8)  | 0.0161 |
| O4  | 0.6758(3)  | 0.4842(1) | 0.6251(2) | 1.00(9)  | 0.0175 |
| O5  | 0.5247(4)  | 0.0710(2) | 0.75      | 1.0(1)   | 0.0169 |
| O6  | 0.4910(3)  | 0.1403(1) | 0.5884(1) | 1.00(8)  | 0.0154 |
| O7  | 0.3058(3)  | 0.4898(1) | 0.6119(2) | 1.00(8)  | 0.0142 |
| O8  | 0.2836(4)  | 0.3762(2) | 0.75      | 1.0(1)   | 0.0135 |
| O9  | 0.2907(3)  | 0.3099(1) | 0.5824(2) | 1.00(8)  | 0.0147 |
| Na1 | 0.4439(3)  | 0.2316(1) | 0.75      | 0.99(1)  | 0.0329 |
| Na2 | −0.0045(3) | 0.25      | 0.5       | 0.994(8) | 0.0214 |
| Ow1 | 0.0094(4)  | 0.1131(2) | 0.5810(2) | 0.973(9) | 0.0299 |
| Ow2 | 0.1226(7)  | 0.1889(4) | 0.75      | 0.96(2)  | 0.0450 |

**Table S5.** Anisotropic atomic displacement parameters ( $\text{\AA}^2$ ) of elpidite sample EIB-2.

| Site | U11       | U22        | U33        | U23         | U13        | U12        |
|------|-----------|------------|------------|-------------|------------|------------|
| Zr   | 0.0090(1) | 0.00780(9) | 0.00930(9) | −0.00006(9) | 0.0000     | 0.0000     |
| Si1  | 0.0069(3) | 0.0106(3)  | 0.0103(4)  | −0.0015(3)  | −0.0006(3) | 0.0006(2)  |
| Si2  | 0.0091(2) | 0.0080(2)  | 0.0109(2)  | 0.0012(2)   | −0.0003(3) | 0.0004(2)  |
| Si3  | 0.0073(3) | 0.0096(3)  | 0.0112(4)  | −0.0009(3)  | 0.0001(3)  | 0.0001(2)  |
| O1   | 0.0069(6) | 0.0207(7)  | 0.0210(7)  | −0.0013(6)  | 0.002(1)   | −0.0002(8) |
| O2   | 0.016(1)  | 0.020(1)   | 0.011(1)   | 0.0000      | 0.0000     | −0.002(1)  |
| O3   | 0.016(1)  | 0.0142(8)  | 0.018(1)   | −0.0045(8)  | −0.0031(9) | −0.0022(8) |
| O4   | 0.0142(9) | 0.0143(8)  | 0.024(1)   | 0.0012(8)   | 0.0007(8)  | 0.0062(7)  |
| O5   | 0.022(2)  | 0.017(1)   | 0.0110(9)  | 0.0000      | 0.0000     | 0.004(1)   |
| O6   | 0.0185(8) | 0.0100(6)  | 0.0178(7)  | 0.0040(5)   | 0.000(1)   | 0.0018(8)  |
| O7   | 0.0137(8) | 0.0113(8)  | 0.0176(9)  | 0.0017(7)   | −0.0044(7) | −0.0041(6) |
| O8   | 0.014(1)  | 0.015(1)   | 0.012(1)   | 0.0000      | 0.0000     | −0.0002(9) |
| O9   | 0.0146(9) | 0.0137(8)  | 0.016(1)   | −0.0033(8)  | 0.0025(9)  | 0.0021(7)  |
| Na1  | 0.043(1)  | 0.0148(9)  | 0.041(1)   | 0.0000      | 0.0000     | 0.0060(8)  |
| Na2  | 0.0177(7) | 0.0201(7)  | 0.0264(8)  | −0.0024(7)  | 0.0000     | 0.0000     |
| Ow1  | 0.025(1)  | 0.024(1)   | 0.040(1)   | 0.011(1)    | −0.003(1)  | 0.002(1)   |
| Ow2  | 0.055(3)  | 0.046(3)   | 0.034(2)   | 0.0000      | 0.0000     | −0.021(2)  |

**Table S6.** Crystallographic coordinates, occupancies and equivalent/isotropic atomic displacement parameters ( $\text{\AA}^2$ ) of elpidite sample EIKhB-1.

| Site | x/a        | y/b        | z/c        | Occ.      | Ueq    |
|------|------------|------------|------------|-----------|--------|
| Zr   | 0.49668(4) | 0.25       | 0.5        | 1.0232(9) | 0.0076 |
| Si1  | 0.77341(7) | 0.38608(4) | 0.64617(4) | 1.0000(7) | 0.0092 |
| Si2  | 0.50611(8) | 0.04743(3) | 0.64196(3) | 1.0000(7) | 0.0088 |
| Si3  | 0.21942(7) | 0.39118(4) | 0.64446(4) | 1.0000(7) | 0.0090 |
| O1   | 0.9960(2)  | 0.4036(1)  | 0.6385(1)  | 1.0000(7) | 0.0171 |
| O2   | 0.7203(3)  | 0.3559(2)  | 0.75       | 1.0000(7) | 0.0172 |
| O3   | 0.7100(2)  | 0.3089(1)  | 0.5772(1)  | 1.0000(7) | 0.0168 |
| O4   | 0.6779(2)  | 0.4843(1)  | 0.6247(1)  | 1.0000(7) | 0.0174 |
| O5   | 0.5193(3)  | 0.0715(1)  | 0.75       | 1.0000(7) | 0.0171 |
| O6   | 0.4926(2)  | 0.13969(9) | 0.5874(1)  | 1.0000(7) | 0.0171 |
| O7   | 0.3073(2)  | 0.4891(1)  | 0.6136(1)  | 1.0000(7) | 0.0151 |
| O8   | 0.2816(3)  | 0.3737(2)  | 0.75       | 1.0000(7) | 0.0158 |

|     |            |           |           |           |        |
|-----|------------|-----------|-----------|-----------|--------|
| O9  | 0.2888(2)  | 0.3098(1) | 0.5815(1) | 1.0000(7) | 0.0170 |
| Na1 | 0.4416(3)  | 0.2313(1) | 0.75      | 0.775(1)  | 0.0312 |
| Na2 | −0.0028(2) | 0.25      | 0.5       | 0.605(1)  | 0.0230 |
| Ca2 | −0.0028(2) | 0.25      | 0.5       | 0.330(1)  | 0.0230 |
| Ow1 | 0.0078(3)  | 0.1135(1) | 0.5822(2) | 0.947(1)  | 0.0323 |
| Ow2 | 0.1206(6)  | 0.1883(3) | 0.75      | 0.747(1)  | 0.0410 |

**Table S7.** Anisotropic atomic displacement parameters ( $\text{\AA}^2$ ) of elpidite sample ElKhB-2.

| Site | U11        | U22        | U33        | U23         | U13        | U12        |
|------|------------|------------|------------|-------------|------------|------------|
| Zr   | 0.00880(8) | 0.00665(8) | 0.00735(8) | −0.00010(7) | 0.0000     | 0.0000     |
| Si1  | 0.0078(2)  | 0.0099(2)  | 0.0099(3)  | −0.0018(2)  | −0.0006(2) | 0.0003(2)  |
| Si2  | 0.0106(2)  | 0.0072(2)  | 0.0086(2)  | 0.0012(1)   | 0.0000(3)  | 0.0000(2)  |
| Si3  | 0.0073(2)  | 0.0102(2)  | 0.0095(3)  | −0.0019(2)  | 0.0005(2)  | −0.0002(2) |
| O1   | 0.0069(5)  | 0.0231(7)  | 0.0214(7)  | −0.0011(5)  | −0.0008(7) | 0.0000(6)  |
| O2   | 0.018(1)   | 0.022(2)   | 0.012(1)   | 0.0000      | 0.0000     | −0.0032(9) |
| O3   | 0.0192(7)  | 0.0156(7)  | 0.0156(9)  | −0.0054(6)  | −0.0057(7) | −0.0026(6) |
| O4   | 0.0160(7)  | 0.0130(7)  | 0.0231(9)  | 0.0007(6)   | 0.0024(6)  | 0.0049(5)  |
| O5   | 0.027(1)   | 0.0156(8)  | 0.0085(8)  | 0.0000      | 0.0000     | 0.0007(9)  |
| O6   | 0.0224(7)  | 0.0107(5)  | 0.0182(6)  | 0.0060(5)   | −0.0007(8) | 0.0009(7)  |
| O7   | 0.0156(7)  | 0.0126(7)  | 0.0171(8)  | 0.0020(6)   | −0.0023(6) | −0.0048(5) |
| O8   | 0.016(1)   | 0.021(1)   | 0.010(1)   | 0.0000      | 0.0000     | 0.0040(8)  |
| O9   | 0.0190(7)  | 0.0135(7)  | 0.019(1)   | −0.0027(6)  | 0.0058(7)  | 0.0027(6)  |
| Na1  | 0.042(1)   | 0.0123(8)  | 0.040(1)   | 0.0000      | 0.0000     | 0.0065(8)  |
| Na2  | 0.0172(4)  | 0.0224(4)  | 0.0292(5)  | −0.0021(4)  | 0.0000     | 0.0000     |
| Ca2  | 0.0172(4)  | 0.0224(4)  | 0.0292(5)  | −0.0021(4)  | 0.0000     | 0.0000     |
| Ow1  | 0.0271(9)  | 0.0268(9)  | 0.043(1)   | 0.0142(8)   | −0.004(1)  | −0.0020(9) |
| Ow2  | 0.053(3)   | 0.037(2)   | 0.033(2)   | 0.0000      | 0.0000     | −0.012(2)  |

**Table S8.** Crystallographic coordinates, occupancies and equivalent/isotropic atomic displacement parameters ( $\text{\AA}^2$ ) of elpidite sample ElKhB-2.

| Site | x/a        | y/b        | z/c        | Occ.     | Ueq    |
|------|------------|------------|------------|----------|--------|
| Zr   | 0.49708(4) | 0.25       | 0.5        | 1.024(2) | 0.0081 |
| Si1  | 0.77403(7) | 0.38645(3) | 0.64596(4) | 1.000(7) | 0.0098 |
| Si2  | 0.50513(8) | 0.04744(3) | 0.64198(3) | 1.000(7) | 0.0094 |
| Si3  | 0.21963(7) | 0.39088(3) | 0.64452(4) | 1.000(7) | 0.0098 |
| O1   | 0.9961(2)  | 0.4035(1)  | 0.6381(1)  | 1.000(7) | 0.0190 |
| O2   | 0.7209(3)  | 0.3569(2)  | 0.75       | 1.000(7) | 0.0185 |
| O3   | 0.7105(2)  | 0.3089(1)  | 0.5772(1)  | 1.000(7) | 0.0179 |
| O4   | 0.6791(2)  | 0.4848(1)  | 0.6238(2)  | 1.000(7) | 0.0187 |
| O5   | 0.5169(4)  | 0.0713(1)  | 0.75       | 1.000(7) | 0.0190 |
| O6   | 0.4935(3)  | 0.13967(8) | 0.58718(9) | 1.000(7) | 0.0182 |
| O7   | 0.3080(2)  | 0.4889(1)  | 0.6146(1)  | 1.000(7) | 0.0167 |
| O8   | 0.2811(3)  | 0.3725(2)  | 0.75       | 1.000(7) | 0.0185 |
| O9   | 0.2882(2)  | 0.3094(1)  | 0.5810(1)  | 1.000(7) | 0.0178 |
| Na1  | 0.4410(4)  | 0.2311(1)  | 0.75       | 0.686(6) | 0.0313 |
| Na2  | −0.0022(2) | 0.25       | 0.5        | 0.399(9) | 0.0259 |
| Ca2  | −0.0022(2) | 0.25       | 0.5        | 0.473(6) | 0.0259 |
| Ow1  | 0.0064(3)  | 0.1142(2)  | 0.5822(2)  | 0.946(6) | 0.0359 |

Ow2      0.1222(8)      0.1882(4)      0.75      0.634(8)      0.0431

**Table S9.** Anisotropic atomic displacement parameters ( $\text{\AA}^2$ ) of elpidite sample ElKhB-2.

| Site | U11        | U22        | U33        | U23         | U13        | U12        |
|------|------------|------------|------------|-------------|------------|------------|
| Zr   | 0.00908(7) | 0.00778(7) | 0.00755(7) | −0.00021(5) | 0.0000     | 0.0000     |
| Si1  | 0.0077(2)  | 0.0117(2)  | 0.0100(3)  | −0.0024(2)  | −0.0008(2) | 0.0002(2)  |
| Si2  | 0.0110(2)  | 0.0082(1)  | 0.0090(2)  | 0.0012(1)   | 0.0000(2)  | 0.0002(2)  |
| Si3  | 0.0076(2)  | 0.0116(2)  | 0.0102(3)  | −0.0023(2)  | 0.0004(2)  | −0.0004(2) |
| O1   | 0.0073(4)  | 0.0259(6)  | 0.0238(6)  | −0.0005(4)  | −0.0005(7) | −0.0005(6) |
| O2   | 0.0172(9)  | 0.027(2)   | 0.012(1)   | 0.0000      | 0.0000     | −0.0024(8) |
| O3   | 0.0210(6)  | 0.0167(6)  | 0.0161(9)  | −0.0041(6)  | −0.0051(6) | −0.0038(6) |
| O4   | 0.0165(6)  | 0.0145(6)  | 0.0250(9)  | 0.0007(6)   | 0.0015 (6) | 0.0063(5)  |
| O5   | 0.030(1)   | 0.0171(7)  | 0.0103(6)  | 0.0000      | 0.0000     | 0.0019(8)  |
| O6   | 0.0255(6)  | 0.0111(4)  | 0.0180(5)  | 0.0063(4)   | 0.0000(8)  | 0.0011(6)  |
| O7   | 0.0164(6)  | 0.0154(6)  | 0.0182(7)  | 0.0009(5)   | −0.0023(5) | −0.0053(5) |
| O8   | 0.0176(9)  | 0.027(1)   | 0.011(1)   | 0.0000      | 0.0000     | 0.0040(8)  |
| O9   | 0.0211(6)  | 0.0145(6)  | 0.0179(9)  | −0.0042(6)  | 0.0082(7)  | 0.0022(5)  |
| Na1  | 0.044(1)   | 0.0123(8)  | 0.038(1)   | 0.0000      | 0.0000     | 0.0077(8)  |
| Na2  | 0.0183(3)  | 0.0249(4)  | 0.0343(5)  | −0.0043(3)  | 0.0000     | 0.0000     |
| Ca2  | 0.0183(3)  | 0.0249(4)  | 0.0343(5)  | −0.0043(3)  | 0.0000     | 0.0000     |
| Ow1  | 0.0288(9)  | 0.0308(9)  | 0.048(1)   | 0.0152(8)   | −0.005(1)  | −0.0025(9) |
| Ow2  | 0.051(3)   | 0.039(3)   | 0.040(3)   | 0.0000      | 0.0000     | −0.015(2)  |

**Table S10.** Selected bond distances ( $\text{\AA}$ ) for tetrahedra and polyhedra of the studied elpidite samples.

|                      | ElB-1     | ElB-2     | ElKhB-1   | ElKhB-2   |
|----------------------|-----------|-----------|-----------|-----------|
| Si1-O1               | 1.609(3)  | 1.612(2)  | 1.611(1)  | 1.610(2)  |
| Si1-O2               | 1.630(1)  | 1.631(1)  | 1.627(1)  | 1.627(1)  |
| Si1-O3               | 1.580(3)  | 1.583(2)  | 1.581(2)  | 1.583(2)  |
| Si1-O4               | 1.625(3)  | 1.629(2)  | 1.623(2)  | 1.624(2)  |
| <Si1-O>              | 1.611(6)  | 1.614(4)  | 1.611(2)  | 1.611(4)  |
| Si2-O4               | 1.623(3)  | 1.621(2)  | 1.625(2)  | 1.624(2)  |
| Si2-O5               | 1.6245(9) | 1.6271(9) | 1.6221(6) | 1.6203(6) |
| Si2-O6               | 1.581(2)  | 1.579(2)  | 1.573(1)  | 1.573(1)  |
| Si2-O7               | 1.636(3)  | 1.638(2)  | 1.635(2)  | 1.635(2)  |
| <Si2-O>              | 1.616(5)  | 1.616(4)  | 1.614(2)  | 1.613(2)  |
| Si3-O1               | 1.607(3)  | 1.608(2)  | 1.606(1)  | 1.607(2)  |
| Si3-O7               | 1.634(3)  | 1.635(2)  | 1.629(1)  | 1.627(2)  |
| Si3-O8               | 1.631(1)  | 1.635(1)  | 1.6267(9) | 1.6263(9) |
| Si3-O9               | 1.590(3)  | 1.594(2)  | 1.585(2)  | 1.589(2)  |
| <Si3-O>              | 1.616(6)  | 1.618(4)  | 1.612(2)  | 1.612(4)  |
| Zr-O3 ( $\times 2$ ) | 2.074(3)  | 2.080(2)  | 2.082(2)  | 2.082(2)  |
| Zr-O6 ( $\times 2$ ) | 2.062(2)  | 2.068(2)  | 2.061(1)  | 2.058(1)  |
| Zr-O9 ( $\times 2$ ) | 2.090(3)  | 2.090(2)  | 2.095(2)  | 2.093(2)  |
| <Zr-O>               | 2.075(7)  | 2.079(5)  | 2.079(4)  | 2.078(4)  |

|                           |          |          |          |          |
|---------------------------|----------|----------|----------|----------|
| Na1-O2                    | 2.672(4) | 2.675(4) | 2.699(3) | 2.715(4) |
| Na1-O5                    | 2.429(4) | 2.431(3) | 2.407(3) | 2.402(3) |
| Na1-O6 ( <sup>×2</sup> )  | 2.734(3) | 2.739(2) | 2.755(2) | 2.758(2) |
| Na1-O8                    | 2.413(4) | 2.416(4) | 2.378(5) | 2.364(4) |
| Na1-O9 ( <sup>×2</sup> )  | 2.907(3) | 2.921(3) | 2.930(2) | 2.935(2) |
| Na1-Ow2                   | 2.362(6) | 2.375(6) | 2.374(5) | 2.358(7) |
| <Na1-O>                   | 2.645(9) | 2.652(8) | 2.654(8) | 2.653(9) |
| Na2-O3 ( <sup>×2</sup> )  | 2.492(3) | 2.493(3) | 2.493(2) | 2.493(2) |
| Na2-O9 ( <sup>×2</sup> )  | 2.577(3) | 2.581(3) | 2.552(2) | 2.540(2) |
| Na2-Ow1 ( <sup>×2</sup> ) | 2.338(3) | 2.339(2) | 2.334(2) | 2.325(2) |
| <Na2-O>                   | 2.469(7) | 2.471(5) | 2.460(4) | 2.453(4) |

**Table S11.** Selected angles (°) for tetrahedra and polyhedra of the studied elpidite samples.

|                             | <b>EIB-1</b> | <b>EIB-2</b> | <b>EIKhB-1</b> | <b>EIKhB-2</b> |
|-----------------------------|--------------|--------------|----------------|----------------|
| O1-Si1-O2                   | 109.74(8)    | 109.57(8)    | 109.72(6)      | 109.72(6)      |
| O1-Si1-O3                   | 111.4(1)     | 111.2(1)     | 110.56(8)      | 110.36(8)      |
| O1-Si1-O4                   | 104.6(1)     | 104.9(1)     | 104.97(8)      | 105.00(8)      |
| O2-Si1-O3                   | 109.1(1)     | 109.3(1)     | 109.56(7)      | 109.69(8)      |
| O2-Si1-O4                   | 108.7(1)     | 108.8(1)     | 108.91(7)      | 109.03(8)      |
| O3-Si1-O4                   | 113.3(1)     | 113.1(1)     | 113.00(9)      | 112.93(9)      |
| <O-Si1-O>                   | 109.5(2)     | 109.5(2)     | 109.5(2)       | 109.5(2)       |
| O4-Si2-O5                   | 109.1(1)     | 109.2(1)     | 108.78(7)      | 108.87(8)      |
| O4-Si2-O6                   | 111.2(1)     | 111.3(1)     | 111.15(8)      | 111.05(8)      |
| O4-Si2-O7                   | 108.7(1)     | 108.6(1)     | 108.66(8)      | 108.80(8)      |
| O5-Si2-O6                   | 107.40(8)    | 107.49(8)    | 108.15(6)      | 108.34(5)      |
| O5-Si2-O7                   | 108.08(9)    | 107.95(9)    | 108.30(7)      | 108.07(7)      |
| O6-Si2-O7                   | 112.2(1)     | 112.1(1)     | 111.74(8)      | 111.63(8)      |
| <O-Si2-O>                   | 109.4(2)     | 109.4(2)     | 109.5(2)       | 109.5(2)       |
| O1-Si3-O7                   | 105.4(1)     | 105.6(1)     | 105.47(8)      | 105.48(8)      |
| O1-Si3-O8                   | 108.86(8)    | 109.86(8)    | 109.85(6)      | 109.96(6)      |
| O1-Si3-O9                   | 112.2(1)     | 112.2(1)     | 111.31(8)      | 110.95(8)      |
| O7-Si3-O8                   | 106.85(9)    | 106.91(9)    | 107.29(7)      | 107.28(7)      |
| O7-Si3-O9                   | 112.7(1)     | 112.4(1)     | 112.39(9)      | 112.66(8)      |
| O8-Si3-O9                   | 109.6(1)     | 109.7(1)     | 110.35(7)      | 110.33(7)      |
| <O-Si3-O>                   | 109.3(2)     | 109.4(2)     | 109.4(2)       | 109.4(2)       |
| O3-Zr-O3                    | 86.50(9)     | 86.37(9)     | 86.14(9)       | 86.07(6)       |
| O3-Zr-O6 ( <sup>×2</sup> )  | 91.52(9)     | 91.37(8)     | 91.26(6)       | 91.12(6)       |
| O3-Zr-O6 ( <sup>×2</sup> )  | 89.96(9)     | 89.99(8)     | 89.93(7)       | 89.92(6)       |
| O3-Zr-O9 ( <sup>×2</sup> )  | 91.11(9)     | 91.22(9)     | 91.98(6)       | 92.34(6)       |
| O6-Zr-O9 ( <sup>×2</sup> )  | 87.30(9)     | 87.54(8)     | 87.98(7)       | 88.10(6)       |
| O6-Zr-O9 ( <sup>×2</sup> )  | 91.28(9)     | 91.16(8)     | 90.87(6)       | 90.89(6)       |
| O9-Zr-O9                    | 91.30(9)     | 91.22(9)     | 89.92(9)       | 89.27(6)       |
| <O-Zr-O>                    | 90.0(3)      | 90.0(3)      | 90.0(3)        | 90.0(2)        |
| O2-Na1-O6 ( <sup>×2</sup> ) | 103.89(4)    | 104.11(4)    | 103.44(3)      | 103.27(3)      |

|                            |           |           |           |           |
|----------------------------|-----------|-----------|-----------|-----------|
| O2-Na1-O9 <sup>(×2)</sup>  | 90.27(4)  | 90.31(4)  | 90.46(3)  | 90.45(3)  |
| O5-Na1-O6 <sup>(×2)</sup>  | 59.70(4)  | 59.65(4)  | 59.71(3)  | 59.76(3)  |
| O6-Na1-O9 <sup>(×2)</sup>  | 60.97(6)  | 60.99(6)  | 60.94(5)  | 60.84(4)  |
| O6-Na1-Ow2 <sup>(×2)</sup> | 89.49(6)  | 89.35(4)  | 89.88(3)  | 90.08(4)  |
| O8-Na1-O9 <sup>(×2)</sup>  | 58.43(5)  | 58.36(4)  | 58.47(3)  | 58.57(3)  |
| O9-Na1-Ow2 <sup>(×2)</sup> | 75.28(4)  | 75.15(4)  | 75.27(3)  | 75.31(3)  |
| O2-Na1-O5                  | 118.8(1)  | 119.2(1)  | 119.3(1)  | 119.7(1)  |
| O2-Na1-O8                  | 75.1(1)   | 75.3(1)   | 76.1(1)   | 76.1(1)   |
| O5-Na1-Ow2                 | 88.6(1)   | 88.4(2)   | 87.9(1)   | 87.6(2)   |
| O8-Na1-Ow2                 | 77.5(1)   | 77.1(2)   | 76.7(1)   | 76.6(2)   |
| <O-Na1-O>                  | 79.8(4)   | 79.8(4)   | 79.8(4)   | 79.8(4)   |
| O3-Na2-O9 <sup>(×2)</sup>  | 109.79(7) | 109.84(8) | 109.78(5) | 109.88(5) |
| O3-Na2-Ow1 <sup>(×2)</sup> | 96.07(8)  | 96.13(8)  | 95.14(6)  | 94.80(7)  |
| O3-Na2-Ow1 <sup>(×2)</sup> | 87.93(8)  | 87.87(8)  | 87.90(6)  | 87.70(7)  |
| O9-Na2-Ow1 <sup>(×2)</sup> | 84.83(8)  | 84.71(8)  | 85.43(6)  | 85.79(7)  |
| O9-Na2-Ow1 <sup>(×2)</sup> | 91.21(8)  | 91.32(8)  | 91.56(6)  | 91.74(7)  |
| O3-Na2-O3                  | 69.54(7)  | 69.62(7)  | 69.54(5)  | 69.49(5)  |
| O9-Na2-O9                  | 70.90(7)  | 70.71(7)  | 70.91(5)  | 70.76(5)  |
| <O-Na2-O>                  | 90.0(2)   | 90.0(2)   | 90.0(2)   | 90.0(2)   |

**Table S12.** Calculated geometrical parameters for polyhedra in the crystal structures of studied elpidite samples. BVS-bond-valence sum [14], ECoN-effective coordination number [15–18], Vp—a volume of the coordination polyhedron [19,20],  $r_v$ -average distance from the volume center to the ligands [19,20],  $\Delta_v$ —a distance of the central atom to the volume center [19,20],  $r_s$ -average distance from the centroid to the ligands [19,20], Vs—a volume of the sphere fitted to the positions of ligands [19,20], ECCv-volume eccentricity [19,20], SPHv-volume sphericity [19,20], m.a.n.—mean atomic number (e<sup>−</sup>).

|                      | EIB-1  | EIB-2  | ElKhB-1 | ElKhB-2 |
|----------------------|--------|--------|---------|---------|
| <b>Si1</b>           |        |        |         |         |
| BVS (vu)             | 4.141  | 4.111  | 4.146   | 4.140   |
| ECoN                 | 3.9783 | 3.9781 | 3.9818  | 3.9827  |
| Vp (Å <sup>3</sup> ) | 2.139  | 2.151  | 2.139   | 2.137   |
| $r_v$ (Å)            | 1.610  | 1.613  | 1.610   | 1.610   |
| $\Delta_v$ (Å)       | 0.045  | 0.044  | 0.042   | 0.040   |
| $r_s$ (Å)            | 1.611  | 1.613  | 1.610   | 1.610   |
| $\Delta$ (Å)         | 0.033  | 0.033  | 0.031   | 0.030   |
| Vs (Å <sup>3</sup> ) | 17.499 | 17.592 | 17.494  | 17.480  |
| ECCv                 | 0.0605 | 0.0605 | 0.0559  | 0.0540  |
| SPHv                 | 0.9999 | 0.9999 | 0.9999  | 0.9998  |
| <b>Si2</b>           |        |        |         |         |
| BVS (vu)             | 4.089  | 4.088  | 4.114   | 4.122   |
| ECoN                 | 3.9737 | 3.9695 | 3.9646  | 3.9658  |
| Vp (Å <sup>3</sup> ) | 2.164  | 2.163  | 2.155   | 2.152   |
| $r_v$ (Å)            | 1.616  | 1.616  | 1.614   | 1.613   |
| $\Delta_v$ (Å)       | 0.035  | 0.036  | 0.035   | 0.034   |
| $r_s$ (Å)            | 1.616  | 1.616  | 1.614   | 1.613   |
| $\Delta$ (Å)         | 0.036  | 0.039  | 0.042   | 0.041   |
| Vs (Å <sup>3</sup> ) | 17.683 | 17.677 | 17.602  | 17.578  |
| ECCv                 | 0.0647 | 0.0703 | 0.0753  | 0.0743  |

| SPHv                 | 1      | 0.9999 | 0.9999 | 1      |
|----------------------|--------|--------|--------|--------|
| <b>Si3</b>           |        |        |        |        |
| BVS (vu)             | 4.093  | 4.066  | 4.132  | 4.125  |
| ECoN                 | 3.9816 | 3.9821 | 3.9824 | 3.9862 |
| Vp (Å <sup>3</sup> ) | 2.158  | 2.167  | 2.145  | 2.146  |
| r <sub>v</sub> (Å)   | 1.615  | 1.617  | 1.611  | 1.612  |
| Δ <sub>v</sub> (Å)   | 0.051  | 0.050  | 0.048  | 0.045  |
| r <sub>s</sub> (Å)   | 1.615  | 1.617  | 1.611  | 1.612  |
| Δ (Å)                | 0.031  | 0.031  | 0.031  | 0.027  |
| Vs (Å <sup>3</sup> ) | 17.647 | 17.720 | 17.529 | 17.543 |
| ECCv                 | 0.0565 | 0.0561 | 0.0557 | 0.0493 |
| SPHv                 | 0.9999 | 0.9999 | 0.9999 | 1      |
| <b>Zr</b>            |        |        |        |        |
| m.a.n.               | 41.4   | 41.44  | 40.928 | 40.96  |
| BVS (vu)             | 4.026  | 3.986  | 3.988  | 4.004  |
| ECoN                 | 5.9937 | 5.9964 | 5.9909 | 5.9901 |
| Vp (Å <sup>3</sup> ) | 11.901 | 11.968 | 11.972 | 11.940 |
| r <sub>v</sub> (Å)   | 2.075  | 2.079  | 2.079  | 2.078  |
| Δ <sub>v</sub> (Å)   | 0.004  | 0.007  | 0.003  | 0.002  |
| r <sub>s</sub> (Å)   | 2.075  | 2.079  | 2.079  | 2.078  |
| Δ (Å)                | 0.010  | 0.007  | 0.008  | 0.007  |
| Vs (Å <sup>3</sup> ) | 37.448 | 37.653 | 37.667 | 37.568 |
| ECCv                 | 0.0151 | 0.0095 | 0.0122 | 0.0105 |
| SPHv                 | 0.9846 | 0.9877 | 0.9797 | 0.9784 |
| <b>Na1</b>           |        |        |        |        |
| m.a.n.               | 11.154 | 10.89  | 8.525  | 7.546  |
| BVS (vu)             | 0.937  | 0.922  | 0.938  | 0.947  |
| ECoN                 | 5.6296 | 5.6644 | 5.3716 | 5.1570 |
| Vp (Å <sup>3</sup> ) | 29.785 | 29.999 | 30.125 | 30.086 |
| r <sub>v</sub> (Å)   | 2.621  | 2.627  | 2.630  | 2.629  |
| Δ <sub>v</sub> (Å)   | 0.301  | 0.310  | 0.301  | 0.297  |
| r <sub>s</sub> (Å)   | 2.654  | 2.660  | 2.664  | 2.660  |
| Δ (Å)                | 0.115  | 0.112  | 0.125  | 0.139  |
| Vs (Å <sup>3</sup> ) | 78.263 | 78.847 | 79.199 | 79.343 |
| ECCv                 | 0.1246 | 0.1210 | 0.1346 | 0.1488 |
| SPHv                 | 0.7652 | 0.7624 | 0.7473 | 0.7409 |
| <b>Na2</b>           |        |        |        |        |
| m.a.n.               | 10.89  | 10.934 | 13.255 | 13.849 |
| BVS (vu)             | 0.976  | 0.974  | 1.332  | 1.172  |
| ECoN                 | 5.5608 | 5.5542 | 5.6192 | 5.6055 |
| Vp (Å <sup>3</sup> ) | 18.711 | 18.744 | 18.533 | 18.361 |
| r <sub>v</sub> (Å)   | 2.469  | 2.471  | 2.460  | 2.452  |
| Δ <sub>v</sub> (Å)   | 0.050  | 0.052  | 0.035  | 0.028  |
| r <sub>s</sub> (Å)   | 2.469  | 2.471  | 2.460  | 2.452  |
| Δ (Å)                | 0.049  | 0.051  | 0.034  | 0.027  |
| Vs (Å <sup>3</sup> ) | 63.022 | 63.173 | 62.340 | 61.782 |
| ECCv                 | 0.0583 | 0.0604 | 0.0406 | 0.0325 |
| SPHv                 | 0.8754 | 0.8748 | 0.8807 | 0.8790 |
| <b>Na2/Ca2</b>       |        |        |        |        |
| m.a.n.               | 10.89  | 10.934 | 13.255 | 13.849 |
| BVS (vu)             | 0.976  | 0.974  | 1.332  | 1.172  |
| ECoN                 | 5.5608 | 5.5542 | 5.6192 | 5.6055 |
| Vp (Å <sup>3</sup> ) | 18.711 | 18.744 | 18.533 | 18.361 |
| r <sub>v</sub> (Å)   | 2.469  | 2.471  | 2.460  | 2.452  |
| Δ <sub>v</sub> (Å)   | 0.050  | 0.052  | 0.035  | 0.028  |
| r <sub>s</sub> (Å)   | 2.469  | 2.471  | 2.460  | 2.452  |
| Δ (Å)                | 0.049  | 0.051  | 0.034  | 0.027  |
| Vs (Å <sup>3</sup> ) | 63.022 | 63.173 | 62.340 | 61.782 |
| ECCv                 | 0.0583 | 0.0604 | 0.0406 | 0.0325 |
| SPHv                 | 0.8754 | 0.8748 | 0.8807 | 0.8790 |



**Table S13.** Calculated distortion parameters for polyhedra in the crystal structures of studied elpidite samples.  $v$ -volume distortion [20,21], BLD-bond length distortion [22], ELD-edge length distortion [22], TAV-tetrahedral angle variance [23], TQE-tetrahedral quadratic elongation [23].

|              | ElB-1    | ElB-2    | ElKhB-1  | ElKhB-2  |
|--------------|----------|----------|----------|----------|
| <b>Si1</b>   |          |          |          |          |
| $v$          | 0.0023   | 0.0020   | 0.0019   | 0.0016   |
| BLD (%)      | 1.0242   | 1.0070   | 0.9159   | 0.9001   |
| ELD (%)      | 1.0944   | 0.9827   | 0.9762   | 1.0018   |
| TAV          | 8.6541   | 7.4989   | 6.8270   | 6.6881   |
| TQE          | 1.0022   | 1.0019   | 1.0017   | 1.0017   |
| <b>Si2</b>   |          |          |          |          |
| $v$          | 0.0012   | 0.0011   | 0.0008   | 0.0020   |
| BLD (%)      | 1.0867   | 1.1531   | 1.2633   | 1.2422   |
| ELD (%)      | 0.8405   | 0.6780   | 0.6051   | 0.5674   |
| TAV          | 3.5513   | 3.5247   | 2.4652   | 2.2345   |
| TQE          | 1.0011   | 1.0011   | 1.0008   | 1.0008   |
| <b>Si3</b>   |          |          |          |          |
| $v$          | 0.0018   | 0.0017   | 0.0015   | 0.0008   |
| BLD (%)      | 1.0523   | 1.0507   | 1.0036   | 0.8885   |
| ELD (%)      | 0.9797   | 0.9341   | 0.8235   | 0.8782   |
| TAV          | 8.2738   | 7.6773   | 6.7584   | 6.8802   |
| TQE          | 1.0020   | 1.0018   | 1.0016   | 1.0017   |
| <b>Zr</b>    |          |          |          |          |
| $v$          | 0.0016   | 0.0014   | 0.0015   | 0.0017   |
| BLD (%)      | 0.4711   | 0.3634   | 0.5878   | 0.6310   |
| ELD (%)      | 1.4310   | 1.3472   | 1.3021   | 1.2831   |
| OAV          | 3.5374   | 3.2871   | 3.2419   | 3.4911   |
| OQE          | 1.0010   | 1.0009   | 1.0010   | 1.0011   |
| <b>Na1</b>   |          |          |          |          |
| $v$          | 0.1220   | 0.1222   | 0.1225   | 0.1252   |
| BLD (%)      | 6.9028   | 6.9225   | 7.5513   | 7.8716   |
| ELD (%)      | 15.4579  | 15.4685  | 16.6580  | 15.8934  |
| <b>Na2</b>   |          |          |          |          |
| $v$          | 0.0673   | 0.0679   | 0.0660   | 0.0664   |
| BLD (%)      | 3.5372   | 3.5613   | 3.4061   | 3.4701   |
| ELD (%)      | 7.9868   | 8.0625   | 7.8156   | 7.8037   |
| OAV          | 155.0161 | 156.2597 | 152.4819 | 152.6757 |
| OQE          | 1.0495   | 1.0500   | 1.0482   | 1.0484   |
| <b>NaCa2</b> |          |          |          |          |
| $v$          | 0.0673   | 0.0679   | 0.0660   | 0.0664   |
| BLD (%)      | 3.5372   | 3.5613   | 3.4061   | 3.4701   |
| ELD (%)      | 7.9868   | 8.0625   | 7.8156   | 7.8037   |
| OAV          | 155.0161 | 156.2597 | 152.4819 | 152.6757 |
| OQE          | 1.0495   | 1.0500   | 1.0482   | 1.0484   |

**Table S14.** Valence balance calculation for studied elpidite sample (ElB-1).

|           | Na1                   | Na2                   | Zr                    | Si1                   | Si2                   | Si3   | $\Sigma$     |
|-----------|-----------------------|-----------------------|-----------------------|-----------------------|-----------------------|-------|--------------|
| <b>O1</b> | -                     | -                     | -                     | 1.039                 | -                     | 1.045 | <b>2.084</b> |
| <b>O2</b> | 0.098                 | -                     | -                     | 0.985 <sup>(x2)</sup> | -                     | -     | <b>2.068</b> |
| <b>O3</b> | -                     | 0.150 <sup>[x2]</sup> | 0.673 <sup>[x2]</sup> | 1.120                 | -                     | -     | <b>1.943</b> |
| <b>O4</b> | -                     | -                     | -                     | 0.997                 | 1.003                 | -     | <b>2.000</b> |
| <b>O5</b> | 0.174                 | -                     | -                     | -                     | 0.999 <sup>[x2]</sup> | -     | <b>2.172</b> |
| <b>O6</b> | 0.084 <sup>[x2]</sup> | -                     | 0.693 <sup>[x2]</sup> | -                     | 1.117                 | -     | <b>1.894</b> |
| <b>O7</b> | -                     | -                     | -                     | -                     | 0.970                 | 0.975 | <b>1.945</b> |

|            |                       |                       |                       |              |              |                       |              |
|------------|-----------------------|-----------------------|-----------------------|--------------|--------------|-----------------------|--------------|
| <b>O8</b>  | 0.181                 | -                     | -                     | -            | -            | 0.982 <sup>(×2)</sup> | <b>2.145</b> |
| <b>O9</b>  | 0.056 <sup>[×2]</sup> | 0.122 <sup>[×2]</sup> | 0.647 <sup>[×2]</sup> | -            | -            | 1.091                 | <b>1.916</b> |
| <b>Ow1</b> | -                     | 0.216 <sup>[×2]</sup> | -                     | -            | -            | -                     | <b>0.204</b> |
| <b>Ow2</b> | 0.204                 | -                     | -                     | -            | -            | -                     | <b>0.216</b> |
| <b>Σ</b>   | <b>0.937</b>          | <b>0.976</b>          | <b>4.026</b>          | <b>4.141</b> | <b>4.089</b> | <b>4.093</b>          |              |

<sup>[×2]</sup>—valence strengths doubled in the calculation of valence balance at the cations

<sup>(×2)</sup>—valence strengths doubled in the calculation of valence balance at the anions

The values *R*<sub>o</sub> and *B* for ion pairs involving oxygen were obtained in [14].

**Table S15.** Valence balance calculation for studied elpidite sample (EIB-2).

|            | <b>Na1</b>            | <b>Na2</b>            | <b>Zr</b>             | <b>Si1</b>            | <b>Si2</b>            | <b>Si3</b>            | <b>Σ</b>     |
|------------|-----------------------|-----------------------|-----------------------|-----------------------|-----------------------|-----------------------|--------------|
| <b>O1</b>  | -                     | -                     | -                     | 1.031                 | -                     | 1.042                 | <b>2.073</b> |
| <b>O2</b>  | 0.097                 | -                     | -                     | 0.982 <sup>(×2)</sup> | -                     | -                     | <b>2.061</b> |
| <b>O3</b>  | -                     | 0.150 <sup>[×2]</sup> | 0.663 <sup>[×2]</sup> | 1.111                 | -                     | -                     | <b>1.924</b> |
| <b>O4</b>  | -                     | -                     | -                     | 0.987                 | 1.008                 | -                     | <b>1.995</b> |
| <b>O5</b>  | 0.173                 | -                     | -                     | -                     | 0.992 <sup>[×2]</sup> | -                     | <b>2.157</b> |
| <b>O6</b>  | 0.083 <sup>[×2]</sup> | -                     | 0.683 <sup>[×2]</sup> | -                     | 1.123                 | -                     | <b>1.889</b> |
| <b>O7</b>  | -                     | -                     | -                     | -                     | 0.965                 | 0.972                 | <b>1.937</b> |
| <b>O8</b>  | 0.180                 | -                     | -                     | -                     | -                     | 0.972 <sup>(×2)</sup> | <b>2.124</b> |
| <b>O9</b>  | 0.054 <sup>[×2]</sup> | 0.121 <sup>[×2]</sup> | 0.647 <sup>[×2]</sup> | -                     | -                     | 1.080                 | <b>1.902</b> |
| <b>Ow1</b> | -                     | 0.216 <sup>[×2]</sup> | -                     | -                     | -                     | -                     | <b>0.216</b> |
| <b>Ow2</b> | 0.198                 | -                     | -                     | -                     | -                     | -                     | <b>0.198</b> |
| <b>Σ</b>   | <b>0.922</b>          | <b>0.974</b>          | <b>3.986</b>          | <b>4.111</b>          | <b>4.088</b>          | <b>4.066</b>          |              |

<sup>[×2]</sup>—valence strengths doubled in the calculation of valence balance at the cations

<sup>(×2)</sup>—valence strengths doubled in the calculation of valence balance at the anions

The values *R*<sub>o</sub> and *B* for ion pairs involving oxygen were obtained in [14].

**Table S16.** Valence balance calculation for studied elpidite sample (ElKhB-1).

|            | <b>Na1</b>            | <b>Na/Ca2*</b>        | <b>Zr</b>             | <b>Si1</b>            | <b>Si2</b>            | <b>Si3</b>            | <b>Σ</b>     |
|------------|-----------------------|-----------------------|-----------------------|-----------------------|-----------------------|-----------------------|--------------|
| <b>O1</b>  | -                     | -                     | -                     | 1.034                 | -                     | 1.047                 | <b>2.081</b> |
| <b>O2</b>  | 0.092                 | -                     | -                     | 0.992 <sup>(×2)</sup> | -                     | -                     | <b>2.076</b> |
| <b>O3</b>  | -                     | 0.171 <sup>[×2]</sup> | 0.660 <sup>[×2]</sup> | 1.117                 | -                     | -                     | <b>1.948</b> |
| <b>O4</b>  | -                     | -                     | -                     | 1.003                 | 0.997                 | -                     | <b>2.000</b> |
| <b>O5</b>  | 0.184                 | -                     | -                     | -                     | 1.005 <sup>[×2]</sup> | -                     | <b>2.194</b> |
| <b>O6</b>  | 0.080 <sup>[×2]</sup> | -                     | 0.695 <sup>[×2]</sup> | -                     | 1.140                 | -                     | <b>1.915</b> |
| <b>O7</b>  | -                     | -                     | -                     | -                     | 0.972                 | 0.987                 | <b>1.959</b> |
| <b>O8</b>  | 0.197                 | -                     | -                     | -                     | -                     | 0.993 <sup>(×2)</sup> | <b>2.183</b> |
| <b>O9</b>  | 0.053 <sup>[×2]</sup> | 0.147 <sup>[×2]</sup> | 0.639 <sup>[×2]</sup> | -                     | -                     | 1.105                 | <b>1.944</b> |
| <b>Ow1</b> | -                     | 0.348 <sup>[×2]</sup> | -                     | -                     | -                     | -                     | <b>0.348</b> |
| <b>Ow2</b> | 0.199                 | -                     | -                     | -                     | -                     | -                     | <b>0.199</b> |
| <b>Σ</b>   | <b>0.938</b>          | <b>1.332</b>          | <b>3.988</b>          | <b>4.146</b>          | <b>4.114</b>          | <b>4.132</b>          |              |

<sup>[×2]</sup>—valence strengths doubled in the calculation of valence balance at the cations

<sup>(×2)</sup>—valence strengths doubled in the calculation of valence balance at the anions

\*calculated according refined occupancies

The values *R*<sub>o</sub> and *B* for ion pairs involving oxygen were obtained in [14].

**Table S17.** Valence balance calculation for studied elpidite sample (ElKhB-2).

|           | <b>Na1</b> | <b>Na/Ca2*</b> | <b>Zr</b> | <b>Si1</b> | <b>Si2</b> | <b>Si3</b> | <b>Σ</b>     |
|-----------|------------|----------------|-----------|------------|------------|------------|--------------|
| <b>O1</b> | -          | -              | -         | 1.037      | -          | 1.045      | <b>2.082</b> |

|            |                       |                       |                       |                      |                       |                      |              |
|------------|-----------------------|-----------------------|-----------------------|----------------------|-----------------------|----------------------|--------------|
| <b>O2</b>  | 0.088                 | -                     | -                     | 0.992 <sup>(*)</sup> | -                     | -                    | <b>2.072</b> |
| <b>O3</b>  | -                     | 0.173 <sup>[*2]</sup> | 0.660 <sup>[*2]</sup> | 1.111                | -                     | -                    | <b>1.944</b> |
| <b>O4</b>  | -                     | -                     | -                     | 1.000                | 1.000                 | -                    | <b>2.000</b> |
| <b>O5</b>  | 0.186                 | -                     | -                     | -                    | 1.010 <sup>[*2]</sup> | -                    | <b>2.206</b> |
| <b>O6</b>  | 0.080 <sup>[*2]</sup> | -                     | 0.700 <sup>[*2]</sup> | -                    | 1.140                 | -                    | <b>1.920</b> |
| <b>O7</b>  | -                     | -                     | -                     | -                    | 0.972                 | 0.992                | <b>1.964</b> |
| <b>O8</b>  | 0.203                 | -                     | -                     | -                    | -                     | 0.994 <sup>(*)</sup> | <b>2.191</b> |
| <b>O9</b>  | 0.052 <sup>[*2]</sup> | 0.154 <sup>[*2]</sup> | 0.642 <sup>[*2]</sup> | -                    | -                     | 1.094                | <b>1.942</b> |
| <b>Ow1</b> | -                     | 0.259 <sup>[*2]</sup> | -                     | -                    | -                     | -                    | <b>0.259</b> |
| <b>Ow2</b> | 0.206                 | -                     | -                     | -                    | -                     | -                    | <b>0.206</b> |
| <b>Σ</b>   | <b>0.947</b>          | <b>1.172</b>          | <b>4.004</b>          | <b>4.140</b>         | <b>4.122</b>          | <b>4.125</b>         |              |

<sup>[\*2]</sup>—valence strengths doubled in the calculation of valence balance at the cations

<sup>(\*)</sup>—valence strengths doubled in the calculation of valence balance at the anions

\*calculated according refined occupancies

The values *R*<sub>o</sub> and *B* for ion pairs involving oxygen were obtained in [14].

**Table S18.** Crystallographic coordinates of the modeled elpidites. The crystal structures were simulated in the space group *P*1. Position occupancies are taken as 1.

| Site  | Na <sub>2</sub> ZrSi <sub>6</sub> O <sub>15</sub> ·3H <sub>2</sub> O model |            |            | Na <sub>1.5</sub> Ca <sub>0.25</sub> ZrSi <sub>6</sub> O <sub>15</sub> ·2.75H <sub>2</sub> O model |            |            | CaZrSi <sub>6</sub> O <sub>15</sub> ·2H <sub>2</sub> O model |            |            |
|-------|----------------------------------------------------------------------------|------------|------------|----------------------------------------------------------------------------------------------------|------------|------------|--------------------------------------------------------------|------------|------------|
|       | <i>x/a</i>                                                                 | <i>y/b</i> | <i>z/c</i> | <i>x/a</i>                                                                                         | <i>y/b</i> | <i>z/c</i> | <i>x/a</i>                                                   | <i>y/b</i> | <i>z/c</i> |
| Zr-1  | 0.4940                                                                     | 0.2507     | 0.5000     | 0.4959                                                                                             | 0.2516     | 0.4997     | 0.5000                                                       | 0.2500     | 0.5000     |
| Zr-2  | 0.5060                                                                     | 0.7507     | 0.5000     | 0.5045                                                                                             | 0.7504     | 0.5003     | 0.5000                                                       | 0.7500     | 0.5000     |
| Zr-3  | 0.5060                                                                     | 0.7507     | 0.0000     | 0.5053                                                                                             | 0.7496     | -0.0003    | 0.5000                                                       | 0.7500     | 0.0000     |
| Zr-4  | 0.4940                                                                     | 0.2507     | 0.0000     | 0.4937                                                                                             | 0.2517     | 0.0022     | 0.5000                                                       | 0.2500     | 0.0000     |
| Si1-1 | 0.7696                                                                     | 0.3865     | 0.6462     | 0.7707                                                                                             | 0.3914     | 0.6430     | 0.7748                                                       | 0.3881     | 0.6462     |
| Si1-2 | 0.2304                                                                     | 0.6150     | 0.3539     | 0.2294                                                                                             | 0.6099     | 0.3564     | 0.2252                                                       | 0.6119     | 0.3538     |
| Si1-3 | 0.2304                                                                     | 0.6149     | 0.1461     | 0.2305                                                                                             | 0.6186     | 0.1499     | 0.2252                                                       | 0.6119     | 0.1462     |
| Si1-4 | 0.7696                                                                     | 0.3866     | 0.8540     | 0.7676                                                                                             | 0.3801     | 0.8503     | 0.7748                                                       | 0.3881     | 0.8538     |
| Si1-5 | 0.2304                                                                     | 0.8866     | 0.8540     | 0.2329                                                                                             | 0.8815     | 0.8509     | 0.2252                                                       | 0.8881     | 0.8538     |
| Si1-6 | 0.7696                                                                     | 0.1149     | 0.1461     | 0.7695                                                                                             | 0.1169     | 0.1471     | 0.7748                                                       | 0.1119     | 0.1462     |
| Si1-7 | 0.7696                                                                     | 0.1150     | 0.3539     | 0.7699                                                                                             | 0.1079     | 0.3571     | 0.7748                                                       | 0.1119     | 0.3538     |
| Si1-8 | 0.2304                                                                     | 0.8864     | 0.6462     | 0.2298                                                                                             | 0.8932     | 0.6420     | 0.2252                                                       | 0.8881     | 0.6462     |
| Si2-1 | 0.5108                                                                     | 0.0488     | 0.6409     | 0.5082                                                                                             | 0.0549     | 0.6464     | 0.5000                                                       | 0.0477     | 0.6409     |
| Si2-2 | 0.4892                                                                     | 0.9526     | 0.3592     | 0.4944                                                                                             | 0.9480     | 0.3553     | 0.5000                                                       | 0.9523     | 0.3591     |
| Si2-3 | 0.4892                                                                     | 0.9525     | 0.1410     | 0.4926                                                                                             | 0.9576     | 0.1353     | 0.5000                                                       | 0.9523     | 0.1409     |
| Si2-4 | 0.5108                                                                     | 0.0489     | 0.8591     | 0.5108                                                                                             | 0.0439     | 0.8657     | 0.5000                                                       | 0.0477     | 0.8591     |
| Si2-5 | 0.4892                                                                     | 0.5489     | 0.8591     | 0.4903                                                                                             | 0.5421     | 0.8643     | 0.5000                                                       | 0.5477     | 0.8591     |
| Si2-6 | 0.5108                                                                     | 0.4525     | 0.1410     | 0.5112                                                                                             | 0.4559     | 0.1368     | 0.5000                                                       | 0.4523     | 0.1409     |
| Si2-7 | 0.5108                                                                     | 0.4526     | 0.3592     | 0.5091                                                                                             | 0.4470     | 0.3525     | 0.5000                                                       | 0.4523     | 0.3591     |
| Si2-8 | 0.4892                                                                     | 0.5488     | 0.6409     | 0.4924                                                                                             | 0.5526     | 0.6447     | 0.5000                                                       | 0.5477     | 0.6409     |
| Si3-1 | 0.2184                                                                     | 0.3944     | 0.6441     | 0.2204                                                                                             | 0.3971     | 0.6429     | 0.2252                                                       | 0.3881     | 0.6461     |
| Si3-2 | 0.7816                                                                     | 0.6070     | 0.3560     | 0.7793                                                                                             | 0.6048     | 0.3578     | 0.7748                                                       | 0.6119     | 0.3539     |
| Si3-3 | 0.7816                                                                     | 0.6069     | 0.1440     | 0.7814                                                                                             | 0.6124     | 0.1468     | 0.7748                                                       | 0.6119     | 0.1461     |
| Si3-4 | 0.2184                                                                     | 0.3945     | 0.8560     | 0.2158                                                                                             | 0.3896     | 0.8536     | 0.2252                                                       | 0.3881     | 0.8539     |
| Si3-5 | 0.7816                                                                     | 0.8945     | 0.8560     | 0.7842                                                                                             | 0.8908     | 0.8542     | 0.7748                                                       | 0.8881     | 0.8539     |
| Si3-6 | 0.2184                                                                     | 0.1069     | 0.1440     | 0.2188                                                                                             | 0.1141     | 0.1463     | 0.2252                                                       | 0.1119     | 0.1461     |
| Si3-7 | 0.2184                                                                     | 0.1070     | 0.3560     | 0.2215                                                                                             | 0.1053     | 0.3577     | 0.2252                                                       | 0.1119     | 0.3539     |
| Si3-8 | 0.7816                                                                     | 0.8944     | 0.6441     | 0.7800                                                                                             | 0.8982     | 0.6424     | 0.7748                                                       | 0.8881     | 0.6461     |
| O1-1  | 0.9931                                                                     | 0.4064     | 0.6422     | 0.9948                                                                                             | 0.4096     | 0.6413     | 0.0000                                                       | 0.4024     | 0.6441     |

|      |        |        |        |        |        |        |        |        |        |
|------|--------|--------|--------|--------|--------|--------|--------|--------|--------|
| O1-2 | 0.0069 | 0.5950 | 0.3579 | 0.0048 | 0.5921 | 0.3600 | 0.0000 | 0.5976 | 0.3559 |
| O1-3 | 0.0069 | 0.5949 | 0.1421 | 0.0065 | 0.6016 | 0.1444 | 0.0000 | 0.5976 | 0.1441 |
| O1-4 | 0.9931 | 0.4065 | 0.8579 | 0.9907 | 0.3998 | 0.8490 | 0.0000 | 0.4024 | 0.8559 |
| O1-5 | 0.0069 | 0.9065 | 0.8579 | 0.0096 | 0.9012 | 0.8565 | 0.0000 | 0.9024 | 0.8559 |
| O1-6 | 0.9931 | 0.0949 | 0.1421 | 0.9938 | 0.0994 | 0.1435 | 0.0000 | 0.0976 | 0.1441 |
| O1-7 | 0.9931 | 0.0950 | 0.3579 | 0.9955 | 0.0937 | 0.3653 | 0.0000 | 0.0979 | 0.3559 |
| O1-8 | 0.0069 | 0.9064 | 0.6422 | 0.0054 | 0.9123 | 0.6399 | 0.0000 | 0.9024 | 0.6441 |
| O2-1 | 0.7079 | 0.3555 | 0.7501 | 0.7010 | 0.3581 | 0.7440 | 0.7076 | 0.3649 | 0.7500 |
| O2-2 | 0.2921 | 0.6459 | 0.2500 | 0.2899 | 0.6482 | 0.2548 | 0.2924 | 0.6351 | 0.2500 |
| O2-3 | 0.2921 | 0.8555 | 0.7501 | 0.2944 | 0.8597 | 0.7445 | 0.2924 | 0.8649 | 0.7500 |
| O2-4 | 0.7079 | 0.1459 | 0.2500 | 0.7092 | 0.1350 | 0.2538 | 0.7076 | 0.1351 | 0.2500 |
| O3-1 | 0.7102 | 0.3094 | 0.5755 | 0.7242 | 0.3133 | 0.5691 | 0.7229 | 0.3071 | 0.5764 |
| O3-2 | 0.2898 | 0.6920 | 0.4246 | 0.2917 | 0.6811 | 0.4328 | 0.2771 | 0.6929 | 0.4236 |
| O3-3 | 0.2898 | 0.6918 | 0.0753 | 0.2928 | 0.6977 | 0.0816 | 0.2771 | 0.6929 | 0.0764 |
| O3-4 | 0.7102 | 0.3097 | 0.9248 | 0.7077 | 0.2961 | 0.9122 | 0.7229 | 0.3071 | 0.9236 |
| O3-5 | 0.2898 | 0.8097 | 0.9248 | 0.2924 | 0.7979 | 0.9139 | 0.2771 | 0.8071 | 0.9236 |
| O3-6 | 0.7102 | 0.1918 | 0.0753 | 0.7090 | 0.1981 | 0.0815 | 0.7229 | 0.1929 | 0.0764 |
| O3-7 | 0.7102 | 0.1920 | 0.4246 | 0.7163 | 0.1856 | 0.4305 | 0.7229 | 0.1929 | 0.4236 |
| O3-8 | 0.2898 | 0.8094 | 0.5755 | 0.2896 | 0.8192 | 0.5682 | 0.2771 | 0.8071 | 0.5764 |
| O4-1 | 0.6756 | 0.4859 | 0.6233 | 0.6771 | 0.4903 | 0.6187 | 0.6881 | 0.4871 | 0.6153 |
| O4-2 | 0.3244 | 0.5155 | 0.3768 | 0.3187 | 0.5078 | 0.3709 | 0.3119 | 0.5129 | 0.3847 |
| O4-3 | 0.3243 | 0.5153 | 0.1234 | 0.3236 | 0.5200 | 0.1257 | 0.3119 | 0.5129 | 0.1153 |
| O4-4 | 0.6757 | 0.4861 | 0.8767 | 0.6728 | 0.4769 | 0.8822 | 0.6881 | 0.4871 | 0.8847 |
| O4-5 | 0.3243 | 0.9861 | 0.8767 | 0.3295 | 0.9776 | 0.8827 | 0.3119 | 0.9871 | 0.8847 |
| O4-6 | 0.6757 | 0.0153 | 0.1234 | 0.6799 | 0.0187 | 0.1144 | 0.6881 | 0.0129 | 0.1153 |
| O4-7 | 0.6756 | 0.0155 | 0.3768 | 0.6802 | 0.0084 | 0.3837 | 0.6881 | 0.0129 | 0.3847 |
| O4-8 | 0.3244 | 0.9859 | 0.6233 | 0.3195 | 0.9950 | 0.6218 | 0.3119 | 0.9871 | 0.6153 |
| O5-1 | 0.5326 | 0.0695 | 0.7500 | 0.5242 | 0.0681 | 0.7565 | 0.5001 | 0.0667 | 0.7500 |
| O5-2 | 0.4674 | 0.9319 | 0.2501 | 0.4840 | 0.9360 | 0.2448 | 0.4999 | 0.9333 | 0.2500 |
| O5-3 | 0.4674 | 0.5695 | 0.7500 | 0.4781 | 0.5655 | 0.7551 | 0.4999 | 0.5667 | 0.7500 |
| O5-4 | 0.5326 | 0.4319 | 0.2501 | 0.5305 | 0.4272 | 0.2440 | 0.5001 | 0.4333 | 0.2500 |
| O6-1 | 0.4886 | 0.1438 | 0.5909 | 0.4964 | 0.1531 | 0.6012 | 0.4999 | 0.1383 | 0.5821 |
| O6-2 | 0.5114 | 0.8576 | 0.4092 | 0.5036 | 0.8493 | 0.3987 | 0.5001 | 0.8617 | 0.4179 |
| O6-3 | 0.5113 | 0.8575 | 0.0911 | 0.5018 | 0.8639 | 0.0817 | 0.5001 | 0.8617 | 0.0821 |
| O6-4 | 0.4887 | 0.1440 | 0.9090 | 0.4865 | 0.1360 | 0.9198 | 0.4999 | 0.1383 | 0.9179 |
| O6-5 | 0.5113 | 0.6440 | 0.9089 | 0.5137 | 0.6353 | 0.9181 | 0.5001 | 0.6383 | 0.9179 |
| O6-6 | 0.4887 | 0.3575 | 0.0911 | 0.4939 | 0.3709 | 0.0709 | 0.4999 | 0.3617 | 0.0821 |
| O6-7 | 0.4886 | 0.3576 | 0.4092 | 0.4927 | 0.3555 | 0.4103 | 0.4999 | 0.3617 | 0.4179 |
| O6-8 | 0.5113 | 0.6438 | 0.5909 | 0.5077 | 0.6513 | 0.6016 | 0.5001 | 0.6383 | 0.5821 |
| O7-1 | 0.3001 | 0.4934 | 0.6074 | 0.3051 | 0.4962 | 0.6094 | 0.3118 | 0.4871 | 0.6152 |
| O7-2 | 0.6999 | 0.5080 | 0.3927 | 0.6960 | 0.5040 | 0.3877 | 0.6882 | 0.5129 | 0.3848 |
| O7-3 | 0.6999 | 0.5079 | 0.1074 | 0.6990 | 0.5153 | 0.1085 | 0.6882 | 0.5129 | 0.1152 |
| O7-4 | 0.3001 | 0.4935 | 0.8926 | 0.2951 | 0.4884 | 0.8916 | 0.3118 | 0.4871 | 0.8848 |
| O7-5 | 0.6999 | 0.9935 | 0.8926 | 0.7057 | 0.9895 | 0.8926 | 0.6882 | 0.9871 | 0.8848 |
| O7-6 | 0.3001 | 0.0079 | 0.1074 | 0.3024 | 0.0155 | 0.1098 | 0.3118 | 0.0129 | 0.1152 |
| O7-7 | 0.3001 | 0.0080 | 0.3927 | 0.3072 | 0.0057 | 0.3882 | 0.3118 | 0.0129 | 0.3848 |
| O7-8 | 0.6999 | 0.9934 | 0.6074 | 0.6973 | 0.9995 | 0.6118 | 0.6882 | 0.9871 | 0.6152 |
| O8-1 | 0.2919 | 0.3829 | 0.7501 | 0.2943 | 0.3796 | 0.7472 | 0.2924 | 0.3650 | 0.7500 |
| O8-2 | 0.7081 | 0.6186 | 0.2500 | 0.7072 | 0.6235 | 0.2528 | 0.7076 | 0.6350 | 0.2500 |

|       |        |        |        |         |        |         |         |        |        |
|-------|--------|--------|--------|---------|--------|---------|---------|--------|--------|
| O8-3  | 0.7081 | 0.8829 | 0.7501 | 0.7103  | 0.8807 | 0.7480  | 0.7076  | 0.8650 | 0.7500 |
| O8-4  | 0.2919 | 0.1186 | 0.2501 | 0.2837  | 0.1277 | 0.2533  | 0.2924  | 0.1350 | 0.2500 |
| O9-1  | 0.2894 | 0.3110 | 0.5834 | 0.2770  | 0.3143 | 0.5759  | 0.2771  | 0.3071 | 0.5764 |
| O9-2  | 0.7106 | 0.6904 | 0.4166 | 0.7121  | 0.6842 | 0.4248  | 0.7229  | 0.6929 | 0.4236 |
| O9-3  | 0.7107 | 0.6903 | 0.0833 | 0.7103  | 0.6973 | 0.0875  | 0.7229  | 0.6929 | 0.0764 |
| O9-4  | 0.2893 | 0.3112 | 0.9168 | 0.2895  | 0.3046 | 0.9109  | 0.2771  | 0.3071 | 0.9236 |
| O9-5  | 0.7107 | 0.8112 | 0.9168 | 0.7094  | 0.8067 | 0.9133  | 0.7229  | 0.8081 | 0.9236 |
| O9-6  | 0.2893 | 0.1903 | 0.0833 | 0.2825  | 0.1968 | 0.0832  | 0.2771  | 0.1929 | 0.0764 |
| O9-7  | 0.2894 | 0.1904 | 0.4166 | 0.2786  | 0.1846 | 0.4291  | 0.2771  | 0.1929 | 0.4236 |
| O9-8  | 0.7106 | 0.8110 | 0.5834 | 0.7110  | 0.8188 | 0.5762  | 0.7229  | 0.8071 | 0.5764 |
| Na1-1 | 0.4407 | 0.2335 | 0.7499 | 0.4505  | 0.2321 | 0.7705  |         |        |        |
| Na1-2 | 0.5593 | 0.7679 | 0.2501 | 0.5531  | 0.7698 | 0.2382  |         |        |        |
| Na1-3 | 0.5593 | 0.7335 | 0.7499 | 0.5552  | 0.7317 | 0.7627  |         |        |        |
| Na1-4 | 0.4407 | 0.2679 | 0.2501 |         |        |         |         |        |        |
| Na2-1 | 0.0006 | 0.2507 | 0.5000 |         |        |         |         |        |        |
| Ca2-1 |        |        |        | −0.0014 | 0.2506 | 0.4987  | 0.0000  | 0.2500 | 0.5000 |
| Na2-2 | 0.9994 | 0.7507 | 0.5000 | 0.0005  | 0.7500 | 0.4999  |         |        |        |
| Ca2-2 |        |        |        |         |        |         | 0.0000  | 0.7500 | 0.5000 |
| Na2-3 | 0.9994 | 0.7507 | 0.0000 | 0.0011  | 0.7497 | 0.0001  |         |        |        |
| Ca2-3 |        |        |        |         |        |         | 0.0000  | 0.7500 | 0.0000 |
| Na2-4 | 0.0006 | 0.2507 | 0.0000 | −0.0022 | 0.2521 | −0.0001 |         |        |        |
| Ca2-4 |        |        |        |         |        |         | 0.0000  | 0.2500 | 0.0000 |
| Ow1-1 | 0.0182 | 0.1113 | 0.5884 | 0.0096  | 0.1142 | 0.5884  | 0.0001  | 0.1058 | 0.5702 |
| H1-1  | 0.9058 | 0.0719 | 0.5915 | 0.8971  | 0.0742 | 0.5938  | −0.1108 | 0.0672 | 0.5828 |
| H2-1  | 0.1262 | 0.0692 | 0.5886 | 0.1200  | 0.0730 | 0.5903  | 0.1111  | 0.0672 | 0.5828 |
| Ow1-2 | 0.9818 | 0.8910 | 0.4117 | 0.9888  | 0.8857 | 0.4075  | −0.0001 | 0.8942 | 0.4298 |
| H1-2  | 0.0942 | 0.9296 | 0.4086 | 0.1017  | 0.9247 | 0.4057  | 0.1108  | 0.9328 | 0.4172 |
| H2-2  | 0.8738 | 0.9323 | 0.4114 | 0.8810  | 0.9279 | 0.4104  | 0.8889  | 0.9328 | 0.4172 |
| Ow1-3 | 0.9818 | 0.8900 | 0.0885 | 0.9858  | 0.8953 | 0.0823  | −0.0001 | 0.8942 | 0.0702 |
| H1-3  | 0.0943 | 0.9295 | 0.0915 | 0.0976  | 0.9348 | 0.0883  | 0.1108  | 0.9328 | 0.0828 |
| H2-3  | 0.8738 | 0.9322 | 0.0887 | 0.8779  | 0.9377 | 0.0819  | 0.8889  | 0.9328 | 0.0828 |
| Ow1-4 | 0.0182 | 0.1114 | 0.9116 | 0.0207  | 0.1078 | 0.9154  | 0.0001  | 0.1058 | 0.9298 |
| H1-4  | 0.9057 | 0.0720 | 0.9085 | 0.9093  | 0.0678 | 0.9107  | −0.1108 | 0.0672 | 0.9172 |
| H2-4  | 0.1262 | 0.0693 | 0.9113 | 0.1292  | 0.0664 | 0.9199  | 0.1111  | 0.0672 | 0.9172 |
| Ow1-5 | 0.9818 | 0.6114 | 0.9116 | 0.9789  | 0.6052 | 0.9180  | −0.0001 | 0.6058 | 0.9298 |
| H1-5  | 0.0943 | 0.5720 | 0.9085 | 0.0910  | 0.5655 | 0.9140  | 0.1108  | 0.5672 | 0.9172 |
| H2-5  | 0.8738 | 0.5693 | 0.9113 | 0.8717  | 0.5629 | 0.9211  | 0.8889  | 0.5672 | 0.9172 |
| Ow1-6 | 0.0182 | 0.3900 | 0.0885 | 0.0122  | 0.4040 | 0.0529  | 0.0001  | 0.3942 | 0.0702 |
| H1-6  | 0.9057 | 0.4295 | 0.0915 | 0.9034  | 0.4410 | 0.0717  | −0.1108 | 0.4328 | 0.0828 |
| H2-6  | 0.1262 | 0.4322 | 0.0887 | 0.1232  | 0.4373 | 0.0746  | 0.1111  | 0.4328 | 0.0828 |
| Ow1-7 | 0.0182 | 0.3901 | 0.4117 | 0.0077  | 0.3893 | 0.4231  | 0.0001  | 0.3942 | 0.4298 |
| H1-7  | 0.9058 | 0.4296 | 0.4086 | 0.8967  | 0.4284 | 0.4116  | −0.1108 | 0.4328 | 0.4172 |
| H2-7  | 0.1262 | 0.4323 | 0.4114 | 0.1189  | 0.4259 | 0.4064  | 0.1111  | 0.4328 | 0.4172 |
| Ow1-8 | 0.9818 | 0.6113 | 0.5884 | 0.9864  | 0.6157 | 0.5938  | −0.0001 | 0.6058 | 0.5702 |
| H1-8  | 0.0942 | 0.5719 | 0.5915 | 0.0990  | 0.5764 | 0.5942  | 0.1108  | 0.5672 | 0.5828 |
| H2-8  | 0.8738 | 0.5692 | 0.5886 | 0.8786  | 0.5736 | 0.5903  | 0.8889  | 0.5672 | 0.5828 |
| Ow2-1 | 0.1215 | 0.1954 | 0.7500 | 0.1275  | 0.1913 | 0.7560  |         |        |        |
| H3-1  | 0.0707 | 0.1639 | 0.6951 | 0.0713  | 0.1603 | 0.7028  |         |        |        |
| H4-1  | 0.0707 | 0.1639 | 0.8049 | 0.0777  | 0.1608 | 0.8121  |         |        |        |

|       |        |        |        |        |        |        |
|-------|--------|--------|--------|--------|--------|--------|
| Ow2-2 | 0.8785 | 0.8060 | 0.2501 | 0.8733 | 0.8111 | 0.2435 |
| H3-2  | 0.9293 | 0.8375 | 0.3050 | 0.9298 | 0.8392 | 0.2988 |
| H4-2  | 0.9294 | 0.8375 | 0.1952 | 0.9268 | 0.8422 | 0.1890 |
| Ow2-3 | 0.8785 | 0.6954 | 0.7500 | 0.8758 | 0.6921 | 0.7578 |
| H3-3  | 0.9294 | 0.6640 | 0.8049 | 0.9244 | 0.6588 | 0.8122 |
| H4-3  | 0.9293 | 0.6639 | 0.6951 | 0.9297 | 0.6628 | 0.7024 |
| Ow2-4 | 0.1215 | 0.3060 | 0.2501 |        |        |        |
| H3-4  | 0.0706 | 0.3375 | 0.1952 |        |        |        |
| H4-4  | 0.0707 | 0.3375 | 0.3050 |        |        |        |

**Table S19.** The positions of the bands (cm<sup>-1</sup>) in the IR spectra of elpidite from literature.

|                | ElMSHil             | ElLov <sup>(a)</sup>                                                                                                   | ElKhB <sup>(b)</sup>  | ElLov <sup>(c)</sup><br>ElKhB <sup>(d)</sup> | ElLov <sup>(e)</sup>                                                                                                                                                        | ElKhib                                                                                                                                           | ElLov <sup>(f)</sup>                                                                                                                                                                                                                                                                                                  | ElKhB <sup>(g)</sup> |
|----------------|---------------------|------------------------------------------------------------------------------------------------------------------------|-----------------------|----------------------------------------------|-----------------------------------------------------------------------------------------------------------------------------------------------------------------------------|--------------------------------------------------------------------------------------------------------------------------------------------------|-----------------------------------------------------------------------------------------------------------------------------------------------------------------------------------------------------------------------------------------------------------------------------------------------------------------------|----------------------|
| v(H-O-H)       | 3533, 3506,<br>3454 | 3540, 3490,<br>3435                                                                                                    | 3551, 3505,<br>3453   | 3551, 3506,<br>3453, 3250                    |                                                                                                                                                                             |                                                                                                                                                  |                                                                                                                                                                                                                                                                                                                       |                      |
| δ(H-O-H)       | 1638                | 1660, 1640,<br>1620                                                                                                    | 1647, 1638            | 1639                                         |                                                                                                                                                                             |                                                                                                                                                  |                                                                                                                                                                                                                                                                                                                       |                      |
| v(Si-O-Si)     | 1200-1100           |                                                                                                                        |                       |                                              |                                                                                                                                                                             |                                                                                                                                                  |                                                                                                                                                                                                                                                                                                                       |                      |
| v(Si-O)        |                     |                                                                                                                        | 1167, 1117,           | 1170-1115                                    |                                                                                                                                                                             |                                                                                                                                                  |                                                                                                                                                                                                                                                                                                                       |                      |
| δ(Si-O-Si)     | 800-500             |                                                                                                                        | 1011, 495,            | below 550                                    |                                                                                                                                                                             |                                                                                                                                                  |                                                                                                                                                                                                                                                                                                                       |                      |
| δ(Si-O-Zr)     |                     |                                                                                                                        | 434                   | 1050-1010                                    |                                                                                                                                                                             |                                                                                                                                                  |                                                                                                                                                                                                                                                                                                                       |                      |
| v(Zr-O)        |                     |                                                                                                                        | 642, 629              | 700-600                                      |                                                                                                                                                                             |                                                                                                                                                  |                                                                                                                                                                                                                                                                                                                       |                      |
| δ(O-Si-O)      |                     |                                                                                                                        |                       | 810-770                                      |                                                                                                                                                                             |                                                                                                                                                  |                                                                                                                                                                                                                                                                                                                       |                      |
| Not attributed |                     | 1168, 1117,<br>1050, 1035,<br>1010, 935,<br>808, 779,<br>708, 674,<br>646, 626,<br>597, 543,<br>520, 490,<br>450, 430, | 809, 779,<br>737, 710 |                                              | 3550, 3505,<br>3450, 3245w,<br>1645, 1168s,<br>1114s,<br>1050sh,<br>1031s, 1009s,<br>808w, 778,<br>741w, 709,<br>645, 626, 599,<br>542, 522,<br>490sh, 460sh,<br>450sh, 430 | 3555, 3445,<br>3260sh,<br>1655sh, 1637,<br>1165sh,<br>1124s, 1018s,<br>802w, 780,<br>706w, 642,<br>630sh, 600sh,<br>535sh, 510sh,<br>450sh, 431s | 3550, 3505,<br>3450, 3235w, 3545, 3500sh,<br>1640, 1169s, 3445, 3250w,<br>1117s, 1640, 1166s,<br>1050sh, 1116s,<br>1034s, 1010s, 1030sh,<br>808w, 778, 1020sh,<br>737w, 708w, 1012s, 809w,<br>680sh, 646, 780, 710w,<br>626, 596, 542, 642, 627, 596,<br>520w, 491w, 541, 500sh,<br>465sh, 450sh, 450sh, 423s<br>429s |                      |

Note: v—stretching vibrations, δ—bending vibrations, w—weak band, sh—shoulder.

ElMSHil<sup>(a)</sup>—elpidite from Mt St. Hilaire (Canada) [9]; ElLov<sup>(a)</sup>—elpidite from Mount Alluav, Lovozero (Russia) [6]; ElKhB<sup>(b)</sup>—elpidite from Khan-Bogdo (Mongolia) [7]; ElLov<sup>(c)</sup>—elpidite from Mount Alluav, Lovozero (Russia) and ElKhB<sup>(d)</sup>—elpidite from Khan-Bogdo (Mongolia) [11]; ElLov<sup>(e)</sup>—elpidite from Kedykverpakhh, Lovozero (Russia) [24]; ElKhib—elpidite from Yukspor, Khibiny (Russia) [24]; ElLov<sup>(f)</sup>—elpidite from Umbozero mine, Lovozero (Russia) [24]; ElKhB<sup>(g)</sup>—elpidite from Khan-Bogdo (Mongolia) [24].

**Table S20.** Calculated vibrational modes in simulated structure models of elpidite (framework–Zr+Si1+S2+Si3).

| Na <sub>2</sub> ZrSi <sub>6</sub> O <sub>15</sub> ·3H <sub>2</sub> O model |                     |                         | Na <sub>1.5</sub> Ca <sub>0.25</sub> ZrSi <sub>6</sub> O <sub>15</sub> ·2.75H <sub>2</sub> O model |                     |                               | CaZrSi <sub>6</sub> O <sub>15</sub> ·2H <sub>2</sub> O model |                     |                  |
|----------------------------------------------------------------------------|---------------------|-------------------------|----------------------------------------------------------------------------------------------------|---------------------|-------------------------------|--------------------------------------------------------------|---------------------|------------------|
| Wavenumber<br>(cm <sup>-1</sup> )                                          | e <sup>2</sup> /amu | Peak attribution        | Wavenumber<br>(cm <sup>-1</sup> )                                                                  | e <sup>2</sup> /amu | Peak attribution              | Wavenumber<br>(cm <sup>-1</sup> )                            | e <sup>2</sup> /amu | Peak attribution |
| 96                                                                         | 0.49                | Na1                     |                                                                                                    |                     |                               |                                                              |                     |                  |
| 129                                                                        | 0.16                | Na2                     | 112                                                                                                | 0.1                 | Na1+ Na2/Ca2+W1               |                                                              |                     |                  |
|                                                                            |                     |                         | 128                                                                                                | 0.05                | Na1+ Na2/Ca2                  |                                                              |                     |                  |
|                                                                            |                     |                         | 129                                                                                                | 0.04                | Na1+ Na2/Ca2+Si1+Si3+W1       |                                                              |                     |                  |
|                                                                            |                     |                         | 138                                                                                                | 0.09                | Na1+                          |                                                              |                     |                  |
|                                                                            |                     |                         |                                                                                                    |                     | Na2/Ca2+framework+W1+W2       |                                                              |                     |                  |
|                                                                            |                     |                         | 142                                                                                                | 0.06                | Na1+ Na2/Ca2+Si1+Si3+W1+W2    | 153–159                                                      | 0.31–0.82           | Ca+framework+W1  |
|                                                                            |                     |                         | 159–162                                                                                            | 0.12–0.23           | Na1+                          |                                                              |                     |                  |
| 166                                                                        | 0.38                | framework+W1+W2         |                                                                                                    |                     | Na2/Ca2+framework+W1+W2       |                                                              |                     |                  |
|                                                                            |                     |                         | 164                                                                                                | 0.07                | framework+W1+W2               |                                                              |                     |                  |
|                                                                            |                     |                         | 168                                                                                                | 0.09                | Si1+Si3+W1                    |                                                              |                     |                  |
| 183                                                                        | 0.19                | Na1+Na2+framework+W1+W2 |                                                                                                    |                     | Na1+                          |                                                              |                     |                  |
| 195                                                                        | 0.16                | Na2+framework+W1        | 174                                                                                                | 0.08                | Na2/Ca2+framework+W1+W2       |                                                              |                     |                  |
|                                                                            |                     |                         | 191                                                                                                | 0.05                | Na2/Ca2+framework+W1          |                                                              |                     |                  |
|                                                                            |                     |                         | 196–216                                                                                            | 0.07–0.10           | Na1+Na2/Ca2+framework+W1+W2   | 200                                                          | 0.33                | Ca+framework+W1  |
|                                                                            |                     |                         |                                                                                                    |                     |                               | 225                                                          | 0.7                 | Zr+Si1+Si3       |
| 226                                                                        | 0.28                | Na2+Si1+W1+W2           | 224                                                                                                | 0.20                | Na1+Na2/Ca2+Si1+Si3+W1+W2     |                                                              |                     |                  |
|                                                                            |                     |                         | 228                                                                                                | 0.04                | Na1+framework+W1              |                                                              |                     |                  |
| 232                                                                        | 0.22                | Na2+Zr+Si1+Si3+W1+W2    | 229                                                                                                | 0.16                | Na1+ Na2/Ca2+Zr+Si1+Si3+W1+W2 |                                                              |                     |                  |
|                                                                            |                     |                         | 231                                                                                                | 0.13                | Na2/Ca2+framework +W1+W2      | 240                                                          | 2.35                | framework        |
| 241                                                                        | 0.24                | Na1+Na2+framework+W1    |                                                                                                    |                     |                               |                                                              |                     |                  |
|                                                                            |                     |                         | 237                                                                                                | 0.04                | Si1+Si3+W1+W2                 |                                                              |                     |                  |
|                                                                            |                     |                         | 243                                                                                                | 0.07                | Na1+Si1+Si3+W1+W2             | 243                                                          | 0.20                | Ca+Si1+Si2+Si3   |

|         |           |                                 |         |           |                                   |         |           |                     |
|---------|-----------|---------------------------------|---------|-----------|-----------------------------------|---------|-----------|---------------------|
| 246-251 | 0.58-1.82 | Na1 + Na2 + framework + W1 + W2 | 245     | 0.09      | Na1+<br>Na2/Ca2+framework+W1+W2   | 258-260 | 0.77-0.82 | framework           |
|         |           |                                 | 246     | 0.32      | Na1+<br>Na2/Ca2+Si1+Si2+Si3+W1+W2 |         |           |                     |
|         |           |                                 | 249-253 | 0.09-0.99 | Na1+<br>Na2/Ca2+framework+W1+W2   |         |           |                     |
|         |           |                                 | 254     | 0.06      | W1+W2                             |         |           |                     |
|         |           |                                 | 259     | 0.64      | Na2+framework+W1+W2               |         |           |                     |
| 270     | 0.12      | Si1+Si2+Si3+W1+W2               | 260     | 0.55      | Na2/Ca2+framework+W1+W2           |         |           |                     |
| 271     | 0.62      | Na1+Na2+framework+W1+W2         | 263-272 | 0.06-0.42 | Na1+<br>Na2/Ca2+framework+W1+W2   |         |           |                     |
| 273     | 0.87      | Na2+Zr+Si2+W1+W2                |         |           |                                   |         |           |                     |
| 281     | 0.24      | Si1+Si2+Si3                     | 275-283 | 0.05-0.26 | framework+W1+W2                   | 286     | 0.27      | framework +W1       |
|         |           |                                 | 284     | 0.09      | Na1+framework+W1+W2               |         |           |                     |
|         |           |                                 | 285-288 | 0.07-0.08 | framework+W1+W2                   |         |           |                     |
|         |           |                                 | 289     | 0.12      | Na1+framework+W1+W2               |         |           |                     |
|         |           |                                 | 290     | 0.23      | Si1+Si2+Si3+W1                    |         |           |                     |
| 305     | 0.18      | framework+W1                    | 293     | 0.05      | framework+W1                      |         |           |                     |
| 311     | 0.14      | Si1+Si2+Si3+W1                  | 297     | 0.10      | framework+W1+W2                   |         |           |                     |
|         |           |                                 | 304     | 0.09      | framework+W1                      |         |           |                     |
| 312     | 1.04      | framework                       | 307-310 | 0.05-0.24 | framework +W1+W2                  | 318     | 1.3       | framework           |
| 316     | 0.46      | framework+W1                    | 310-328 | 0.11-0.42 | framework+W1                      |         |           |                     |
| 396     | 0.81      | Si1+Si2+Si3                     | 355     | 0.06      | Na2/Ca2+ framework +W1            | 323     | 0.30      | Ca+framework<br>+W1 |
|         |           |                                 |         |           |                                   | 337     | 0.24      | Ca+W1               |
|         |           |                                 |         |           |                                   | 399     | 0.65      | Ca+framework+W1     |
|         |           |                                 |         |           |                                   |         |           |                     |
|         |           |                                 |         |           |                                   |         |           |                     |



|         |           |                   |         |           |                   |         |           |                 |
|---------|-----------|-------------------|---------|-----------|-------------------|---------|-----------|-----------------|
| 401–420 | 1.20–3.90 | Si1+Si2+Si3+W1    | 398–405 | 0.24–0.67 | framework+W1      |         |           |                 |
|         |           |                   | 406–409 | 1.24–2.69 | Si1+Si2+Si3+W1+W2 |         |           |                 |
|         |           |                   | 410–422 | 0.05–0.58 | framework +W1     | 411     | 6.61      | framework+W1    |
|         |           |                   | 470     | 0.08      | Si1+Si2+Si3+W1    |         |           |                 |
|         |           |                   | 475–478 | 0.14–0.18 | W1                |         |           |                 |
|         |           |                   | 478     | 0.12      | Si2+Si3+W1+W2     |         |           |                 |
|         |           |                   | 480     | 0.16      | W1                |         |           |                 |
| 480     | 1.08      | framework+W1+W2   | 482     | 0.63      | framework+W1+W2   |         |           |                 |
|         |           |                   | 484     | 0.16      | Si1+Si2+Si3+W1+W2 |         |           |                 |
| 487     | 0.44      | Si1+W1            |         |           |                   | 481     | 0.64      | Si1+Si3+W1      |
|         |           |                   |         |           |                   | 489     | 0.79      | Ca+framework+W1 |
|         |           |                   | 495     | 0.17      | W1                |         |           |                 |
|         |           |                   | 498     | 0.07      | Si1+W1+W2         |         |           |                 |
|         |           |                   | 501     | 0.39      | W1+W2             |         |           |                 |
|         |           |                   | 507–513 | 0.08–0.16 | W1                |         |           |                 |
|         |           |                   | 518     | 0.17      | W1+W2             |         |           |                 |
| 505     | 0.26      | Si1+Si2+Si3+W1+W2 | 520     | 0.30      | Si1+Si2+Si3+W1+W2 |         |           |                 |
|         |           |                   |         |           |                   | 512     | 0.59      | Si1+Si2+Si3+W1  |
|         |           |                   |         |           |                   | 513     | 0.55      | framework+W1    |
| 522     | 0.83      | Si1+Si2+Si3+W1    |         |           |                   |         |           |                 |
|         |           |                   | 526–530 | 0.14–0.22 | W1+W2             |         |           |                 |
|         |           |                   | 535     | 0.06      | W1                |         |           |                 |
| 547–574 | 0.17–1.43 | W1+W2             | 537–580 | 0.06–0.35 | W1+W2             |         |           |                 |
|         |           |                   | 580–586 | 0.04–0.16 | W1                | 561–597 | 0.21–2.83 | W1              |
| 588–609 | 0.18–1.24 | framework+W1+W2   |         |           |                   |         |           |                 |
| 609     | 0.17      | W1+W2             | 602–607 | 0.05–0.28 | W1+W2             |         |           |                 |
|         |           |                   | 607     | 0.29      | Si1+Si2+Si3+W1    |         |           |                 |
| 616     | 0.30      | Si2+Si3+W1+W2     |         |           |                   | 615     | 1.91      | framework+W1    |
| 623     | 2.62      | W1+W2             | 612–633 | 0.11–1.68 | W1+W2             |         |           |                 |
|         |           |                   |         |           |                   | 632     | 1.75      | framework       |

|           |           |                   |           |           |                   |          |            |                 |
|-----------|-----------|-------------------|-----------|-----------|-------------------|----------|------------|-----------------|
| 636       | 0.38      | Si1+W1+W2         | 635       | 0.18      | Si1+Si3+W1+W2     |          |            |                 |
| 637       | 0.35      | Si1+Si2+Si3+W1+W2 |           |           |                   |          |            |                 |
|           |           |                   | 636–664   | 0.06–0.21 | W1                | 652      | 0.56       | W1              |
|           |           |                   | 688       | 0.08      | Si1+Si3+W1+W2     |          |            |                 |
|           |           |                   | 691–696   | 0.08–0.13 | Si1+Si2+Si3+W1+W2 |          |            |                 |
| 691       | 0.17      | framework+W1+W2   |           |           |                   |          |            |                 |
|           |           |                   |           |           |                   | 694–768  | 0.48–2.00  | framework       |
|           |           |                   | 708       | 0.18      | W1+W2             |          |            |                 |
| 720       | 0.88      | Si1+Si2+Si3+W1+W2 | 716–718   | 0.12–0.13 | Si1+Si2+Si3+W1+W2 |          |            |                 |
| 735       | 0.79      | W1+W2             | 735–743   | 0.05–0.33 | W1+W2             |          |            |                 |
| 740–792   | 0.14–1.18 | Si1+Si2+Si3+W1+W2 | 748       | 0.12      | Si1+Si2+Si3+W1+W2 |          |            |                 |
|           |           |                   | 760       | 0.04      | W1+W2             |          |            |                 |
|           |           |                   | 761       | 1.27      | Si1+Si2+Si3+W1+W2 |          |            |                 |
|           |           |                   | 763       | 0.13      | Si2+Si3+W1+W2     |          |            |                 |
|           |           |                   | 765       | 0.11      | W1                |          |            |                 |
|           |           |                   | 790–793   | 0.23–0.52 | Si1+Si3+W1+W2     |          |            |                 |
|           |           |                   |           |           |                   | 801      | 0.67       | Si1 + Si2 + Si3 |
| 861       | 0.55      | W1+W2             | 833–888   | 0.09–0.23 | W1+W2             |          |            |                 |
|           |           |                   | 948       | 0.81      | Si1+Si3           |          |            |                 |
|           |           |                   |           |           |                   | 950–980  | 3.68–5.80  | framework       |
|           |           |                   | 953       | 1.56      | Si1+Si2+Si3       |          |            |                 |
|           |           |                   | 954       | 0.26      | Si2+Si3           |          |            |                 |
|           |           |                   | 960       | 2.73      | Si1+Si3           |          |            |                 |
| 976       | 3.04      | Si2+Si3           | 963–966   | 0.05–0.70 | Si2+Si3           |          |            |                 |
|           |           |                   | 973–978   | 0.28–2.45 | Si1+Si2+Si3       |          |            |                 |
|           |           |                   | 981       | 2.43      | Si1+Si3           |          |            |                 |
| 982       | 7.3       | framework         | 985–998   | 0.62–3.15 | framework         | 984–1005 | 2.19–18.88 | framework       |
| 986–999   | 1.26–5.02 | Zr+Si1+Si3        | 1000      | 0.61      | Zr+Si1+Si3        |          |            |                 |
| 1010      | 10.04     | framework         | 1000–1029 | 0.4–3.74  | framework         |          |            |                 |
| 1015      | 4.71      | Zr+Si1+Si3        |           |           |                   |          |            |                 |
| 1021–1022 | 3.35–7.07 | Si1+Si2+Si3       |           |           |                   |          |            |                 |
| 1030      | 7.51      | framework         |           |           |                   |          |            |                 |

|           |           |                |           |           |                   |           |           |              |
|-----------|-----------|----------------|-----------|-----------|-------------------|-----------|-----------|--------------|
| 1074-1084 | 1.07-1.69 | framework+W1   | 1031      | 1.35      | Si1+Si2           | 1032      | 6.24      | Si1+Si2      |
|           |           |                | 1054-1094 | 0.10-0.78 | framework+W1      | 1061      | 2.68      | framework+W1 |
|           |           |                |           |           |                   | 1085      | 2.27      | Si1+Si3      |
| 1100      | 0.20      | Si1+Si2+Si3+W1 | 1097      | 0.08      | Si1+Si2+Si3+W1+W2 |           |           |              |
|           |           |                | 1111      | 0.11      | Si1+Si2+Si3+W1    |           |           |              |
|           |           |                | 1120-1128 | 0.07-2.5  | Si2               |           |           |              |
| 1122      | 2.09      | Si2            | 1142      | 0.12      | Si1+Si3           |           |           |              |
|           |           |                | 1145-1148 | 0.06-0.12 | Si1+Si2+Si3       | 1139      | 4.69      | Si1+Si2+Si3  |
|           |           |                | 1149      | 0.07      | Si1+Si3           |           |           |              |
|           |           |                | 1152-1165 | 0.05-0.43 | framework         |           |           |              |
|           |           |                | 1167-1170 | 0.38-0.61 | Si1+Si3           | 1166      | 3.9       | Si1+Si3      |
|           |           |                | 1173      | 0.47      | Si1+Si2+Si3       |           |           |              |
|           |           |                | 1175      | 0.26      | Si1+Si3           |           |           |              |
|           |           |                | 1178-1188 | 0.21-1.70 | framework         |           |           |              |
| 1171-1182 | 1.01-2.95 | framework      |           |           |                   | 1592      | 1.45      | W1           |
|           |           |                | 1584-1589 | 0.04-0.72 | W1+W2             |           |           |              |
|           |           |                | 1591      | 0.07      | W2                |           |           |              |
| 1589      | 1.26      | W1+W2          | 1597      | 0.17      | W1+W2             |           |           |              |
|           |           |                | 1599      | 0.24      | W1                |           |           |              |
|           |           |                | 1604      | 0.04      | W1+W2             |           |           |              |
| 1592      | 0.14      | W2             | 3262-3308 | 1.15-1.28 | W2                |           |           |              |
|           |           |                | 3315      | 1.28      | W1+W2             |           |           |              |
|           |           |                | 3327-3367 | 0.86-1.50 | W2                |           |           |              |
| 1594      | 0.25      | W1+W2          | 3385-3467 | 0.60-1.49 | W1+W2             |           |           |              |
|           |           |                |           |           |                   | 3420-3424 | 1.11-4.68 | W1           |
|           |           |                | 3473      | 1.05      | W1                |           |           |              |
| 3312-3347 | 0.85-4.97 | W2             | 3482-3487 | 0.21-0.89 | W1+W2             | 3471      | 10.09     | W1           |
|           |           |                | 3491-3517 | 0.68-1.20 | W1                |           |           |              |
|           |           |                | 3519      | 1.01      | W2                |           |           |              |
| 3459-3465 | 1.63-2.45 | W1+W2          | 3532-3605 | 0.74-1.05 | W1                |           |           |              |
|           |           |                |           |           |                   |           |           |              |
|           |           |                |           |           |                   |           |           |              |
| 3517-3519 | 0.33-5.05 | W1             |           |           |                   |           |           |              |
|           |           |                |           |           |                   |           |           |              |
|           |           |                |           |           |                   |           |           |              |

**Table S21.** Comparative geometrical parameters for tetrahedra and polyhedra in the crystal structures of studied samples and simulated models of  $\text{Na}_2\text{ZrSi}_6\text{O}_{15}\cdot 3\text{H}_2\text{O}$  and  $\text{Na}_{1.5}\text{Ca}_{0.25}\text{ZrSi}_6\text{O}_{15}\cdot 2.75\text{H}_2\text{O}$  elpidite. ABL—average bond length;  $P_{\text{vol}}$ —polyhedral volume; BLD—bond length distortion [22], TAV—tetrahedral angle variance [23], TQE—tetrahedral quadratic elongation [23].

| Atom  | ABL   | $P_{\text{vol}}$ | BLD   | TQE/<br>OQE | TAV/<br>OAV | ABL   | $P_{\text{vol}}$ | BLD   | TQE/<br>OQE | TAV/<br>OAV | Atom                                                                       | ABL   | $P_{\text{vol}}$ | BLD   | TQE/<br>OQE | TAV/<br>OAV |
|-------|-------|------------------|-------|-------------|-------------|-------|------------------|-------|-------------|-------------|----------------------------------------------------------------------------|-------|------------------|-------|-------------|-------------|
| EIB-1 |       |                  |       |             |             | EIB-2 |                  |       |             |             | Na <sub>2</sub> ZrSi <sub>6</sub> O <sub>15</sub> ·3H <sub>2</sub> O model |       |                  |       |             |             |
| Zr    | 2.075 | 11.901           | 0.471 | 1.0010      | 3.5374      | 2.079 | 11.968           | 0.363 | 1.0009      | 3.2871      | Zr-1                                                                       | 2.078 | 11.915           | 0.662 | 1.0023      | 7.9051      |
|       |       |                  |       |             |             |       |                  |       |             |             | Zr-2                                                                       | 2.078 | 11.915           | 0.661 | 1.0023      | 7.9053      |
|       |       |                  |       |             |             |       |                  |       |             |             | Zr-3                                                                       | 2.078 | 11.915           | 0.656 | 1.0023      | 7.9093      |
|       |       |                  |       |             |             |       |                  |       |             |             | Zr-4                                                                       | 2.078 | 11.915           | 0.656 | 1.0023      | 7.9092      |
| Si1   | 1.611 | 2.139            | 1.024 | 1.0022      | 8.6541      | 1.614 | 2.151            | 1.007 | 1.0019      | 7.4989      | Si1-1                                                                      | 1.624 | 2.187            | 1.211 | 1.0029      | 11.1793     |
|       |       |                  |       |             |             |       |                  |       |             |             | Si1-2                                                                      | 1.624 | 2.187            | 1.211 | 1.0029      | 11.1784     |
|       |       |                  |       |             |             |       |                  |       |             |             | Si1-3                                                                      | 1.624 | 2.188            | 1.213 | 1.0029      | 11.1797     |
|       |       |                  |       |             |             |       |                  |       |             |             | Si1-4                                                                      | 1.624 | 2.188            | 1.213 | 1.0029      | 11.1808     |
|       |       |                  |       |             |             |       |                  |       |             |             | Si1-5                                                                      | 1.624 | 2.188            | 1.213 | 1.0029      | 11.1797     |
|       |       |                  |       |             |             |       |                  |       |             |             | Si1-6                                                                      | 1.624 | 2.188            | 1.213 | 1.0029      | 11.1813     |
|       |       |                  |       |             |             |       |                  |       |             |             | Si1-7                                                                      | 1.624 | 2.187            | 1.211 | 1.0029      | 11.1787     |
|       |       |                  |       |             |             |       |                  |       |             |             | Si1-8                                                                      | 1.624 | 2.187            | 1.211 | 1.0029      | 11.1793     |
| Si2   | 1.616 | 2.164            | 1.087 | 1.0011      | 3.5513      | 1.616 | 2.163            | 1.153 | 1.0011      | 3.5247      | Si2-1                                                                      | 1.624 | 2.196            | 1.271 | 1.0012      | 3.4065      |
|       |       |                  |       |             |             |       |                  |       |             |             | Si2-2                                                                      | 1.624 | 2.196            | 1.271 | 1.0012      | 3.4062      |
|       |       |                  |       |             |             |       |                  |       |             |             | Si2-3                                                                      | 1.624 | 2.196            | 1.272 | 1.0012      | 3.4300      |
|       |       |                  |       |             |             |       |                  |       |             |             | Si2-4                                                                      | 1.624 | 2.196            | 1.272 | 1.0012      | 3.4297      |
|       |       |                  |       |             |             |       |                  |       |             |             | Si2-5                                                                      | 1.624 | 2.196            | 1.272 | 1.0012      | 3.4298      |
|       |       |                  |       |             |             |       |                  |       |             |             | Si2-6                                                                      | 1.624 | 2.196            | 1.272 | 1.0012      | 3.4291      |
|       |       |                  |       |             |             |       |                  |       |             |             | Si2-7                                                                      | 1.624 | 2.196            | 1.271 | 1.0012      | 3.4051      |
|       |       |                  |       |             |             |       |                  |       |             |             | Si2-8                                                                      | 1.624 | 2.196            | 1.272 | 1.0012      | 3.4053      |
| Si3   | 1.616 | 2.158            | 1.052 | 1.0020      | 8.2738      | 1.618 | 2.167            | 1.051 | 1.0018      | 7.6773      | Si3-1                                                                      | 1.627 | 2.200            | 1.377 | 1.0028      | 11.4875     |
|       |       |                  |       |             |             |       |                  |       |             |             | Si3-2                                                                      | 1.627 | 2.200            | 1.377 | 1.0028      | 11.4863     |
|       |       |                  |       |             |             |       |                  |       |             |             | Si3-3                                                                      | 1.627 | 2.200            | 1.378 | 1.0028      | 11.4831     |
|       |       |                  |       |             |             |       |                  |       |             |             | Si3-4                                                                      | 1.627 | 2.200            | 1.378 | 1.0028      | 11.4846     |
|       |       |                  |       |             |             |       |                  |       |             |             | Si3-5                                                                      | 1.627 | 2.200            | 1.378 | 1.0028      | 11.4837     |
|       |       |                  |       |             |             |       |                  |       |             |             | Si3-6                                                                      | 1.627 | 2.200            | 1.378 | 1.0028      | 11.4838     |
|       |       |                  |       |             |             |       |                  |       |             |             | Si3-7                                                                      | 1.627 | 2.200            | 1.377 | 1.0028      | 11.4868     |
|       |       |                  |       |             |             |       |                  |       |             |             | Si3-8                                                                      | 1.627 | 2.200            | 1.377 | 1.0028      | 11.4863     |

| Na1     | 2.645 | 29.785           | 6.903 |             |             | 2.652   | 29.999           | 6.923 |             |             | Na1-1                                                                                              | 2.633 | 29.195           | 6.111 |             |             |
|---------|-------|------------------|-------|-------------|-------------|---------|------------------|-------|-------------|-------------|----------------------------------------------------------------------------------------------------|-------|------------------|-------|-------------|-------------|
|         |       |                  |       |             |             |         |                  |       |             |             | Na1-2                                                                                              | 2.633 | 29.196           | 6.111 |             |             |
|         |       |                  |       |             |             |         |                  |       |             |             | Na1-3                                                                                              | 2.633 | 29.195           | 6.111 |             |             |
|         |       |                  |       |             |             |         |                  |       |             |             | Na1-4                                                                                              | 2.633 | 29.195           | 6.111 |             |             |
| Na2     | 2.469 | 18.711           | 3.537 | 1.0495      | 155.0161    | 2.471   | 18.744           | 3.561 | 1.0500      | 156.2597    | Na2-1                                                                                              | 2.490 | 19.267           | 1.740 | 1.0453      | 151.6649    |
|         |       |                  |       |             |             |         |                  |       |             |             | Na2-2                                                                                              | 2.490 | 19.267           | 1.740 | 1.0453      | 151.6684    |
|         |       |                  |       |             |             |         |                  |       |             |             | Na2-3                                                                                              | 2.490 | 19.257           | 1.743 | 1.0454      | 151.9255    |
|         |       |                  |       |             |             |         |                  |       |             |             | Na2-4                                                                                              | 2.490 | 19.257           | 1.743 | 1.0454      | 151.9252    |
| Atom    | ABL   | P <sub>vol</sub> | BLD   | TQE/<br>OQE | TAV/<br>OAV | ABL     | P <sub>vol</sub> | BLD   | TQE/<br>OQE | TAV/<br>OAV | Atom                                                                                               | ABL   | P <sub>vol</sub> | BLD   | TQE/<br>OQE | TAV/<br>OAV |
| ElKhB-1 |       |                  |       |             |             | ElKhB-2 |                  |       |             |             | Na <sub>1.5</sub> Ca <sub>0.25</sub> ZrSi <sub>6</sub> O <sub>15</sub> ·2.75H <sub>2</sub> O model |       |                  |       |             |             |
| Zr      | 2.079 | 11.972           | 0.588 | 1.0010      | 3.2419      | 2.078   | 11.940           | 0.631 | 1.0011      | 3.4911      | Zr-1                                                                                               | 2.089 | 12.050           | 1.530 | 1.0061      | 19.0793     |
|         |       |                  |       |             |             |         |                  |       |             |             | Zr-2                                                                                               | 2.082 | 12.015           | 0.316 | 1.0014      | 4.8155      |
|         |       |                  |       |             |             |         |                  |       |             |             | Zr-3                                                                                               | 2.080 | 11.958           | 0.647 | 1.0020      | 6.7654      |
|         |       |                  |       |             |             |         |                  |       |             |             | Zr-4                                                                                               | 2.082 | 11.974           | 1.188 | 1.0031      | 9.7997      |
| Si1     | 1.611 | 2.139            | 0.916 | 1.0017      | 6.8270      | 1.611   | 2.137            | 0.900 | 1.0017      | 6.6881      | Si1-1                                                                                              | 1.624 | 2.191            | 0.668 | 1.0026      | 9.7587      |
|         |       |                  |       |             |             |         |                  |       |             |             | Si1-2                                                                                              | 1.625 | 2.194            | 1.161 | 1.0030      | 11.8268     |
|         |       |                  |       |             |             |         |                  |       |             |             | Si1-3                                                                                              | 1.623 | 2.186            | 1.078 | 1.0023      | 8.7445      |
|         |       |                  |       |             |             |         |                  |       |             |             | Si1-4                                                                                              | 1.625 | 2.191            | 1.428 | 1.0034      | 14.2967     |
|         |       |                  |       |             |             |         |                  |       |             |             | Si1-5                                                                                              | 1.623 | 2.188            | 1.141 | 1.0024      | 9.3672      |
|         |       |                  |       |             |             |         |                  |       |             |             | Si1-6                                                                                              | 1.624 | 2.188            | 1.216 | 1.0029      | 11.6840     |
|         |       |                  |       |             |             |         |                  |       |             |             | Si1-7                                                                                              | 1.624 | 2.188            | 1.216 | 1.0029      | 11.6840     |
|         |       |                  |       |             |             |         |                  |       |             |             | Si1-8                                                                                              | 1.628 | 2.199            | 1.311 | 1.0034      | 13.2361     |
| Si2     | 1.614 | 2.155            | 1.263 | 1.0008      | 2.4652      | 1.613   | 2.152            | 1.242 | 1.0008      | 2.2345      | Si2-1                                                                                              | 1.628 | 2.211            | 1.288 | 1.0009      | 2.0664      |
|         |       |                  |       |             |             |         |                  |       |             |             | Si2-2                                                                                              | 1.626 | 2.204            | 1.375 | 1.0015      | 4.9548      |
|         |       |                  |       |             |             |         |                  |       |             |             | Si2-3                                                                                              | 1.624 | 2.195            | 1.189 | 1.0010      | 3.1491      |
|         |       |                  |       |             |             |         |                  |       |             |             | Si2-4                                                                                              | 1.625 | 2.197            | 1.450 | 1.0014      | 4.5107      |
|         |       |                  |       |             |             |         |                  |       |             |             | Si2-5                                                                                              | 1.626 | 2.202            | 1.213 | 1.0013      | 3.9767      |
|         |       |                  |       |             |             |         |                  |       |             |             | Si2-6                                                                                              | 1.625 | 2.200            | 1.337 | 1.0009      | 2.9911      |
|         |       |                  |       |             |             |         |                  |       |             |             | Si2-7                                                                                              | 1.627 | 2.210            | 1.393 | 1.0007      | 1.8161      |
|         |       |                  |       |             |             |         |                  |       |             |             | Si2-8                                                                                              | 1.628 | 2.208            | 1.345 | 1.0018      | 5.7950      |
|         |       |                  |       |             |             |         |                  |       |             |             | Si3-1                                                                                              | 1.628 | 2.206            | 0.790 | 1.0023      | 8.9086      |
|         |       |                  |       |             |             |         |                  |       |             |             | Si3-2                                                                                              | 1.626 | 2.200            | 1.243 | 1.0026      | 10.5492     |
|         |       |                  |       |             |             |         |                  |       |             |             | Si3-3                                                                                              | 1.624 | 2.193            | 1.157 | 1.0021      | 8.4697      |

|         |       |        |       |        |          |       |        |       |        |          |       |       |        |       |        |          |
|---------|-------|--------|-------|--------|----------|-------|--------|-------|--------|----------|-------|-------|--------|-------|--------|----------|
| Si3     | 1.612 | 2.145  | 1.004 | 1.0016 | 6.7584   | 1.612 | 2.146  | 0.889 | 1.0017 | 6.8802   | Si3-4 | 1.629 | 2.208  | 1.662 | 1.0036 | 15.5307  |
|         |       |        |       |        |          |       |        |       |        |          | Si3-5 | 1.627 | 2.201  | 1.365 | 1.0028 | 11.6244  |
|         |       |        |       |        |          |       |        |       |        |          | Si3-6 | 1.626 | 2.197  | 1.365 | 1.0030 | 12.0822  |
|         |       |        |       |        |          |       |        |       |        |          | Si3-7 | 1.627 | 2.199  | 0.635 | 1.0027 | 10.4764  |
|         |       |        |       |        |          |       |        |       |        |          | Si3-8 | 1.628 | 2.206  | 1.391 | 1.0034 | 13.8750  |
| Na1     | 2.654 | 30.125 | 7.551 |        |          | 2.653 | 30.086 | 7.872 |        |          | Na1-1 | 2.597 | 27.485 | 4.718 |        |          |
|         |       |        |       |        |          |       |        |       |        |          | Na1-2 | 2.558 | 23.029 | 4.435 |        |          |
|         |       |        |       |        |          |       |        |       |        |          | Na1-3 | 2.574 | 23.345 | 4.414 |        |          |
| Na2/Ca2 | 2.460 | 18.533 | 3.406 | 1.0482 | 152.4819 | 2.453 | 18.361 | 3.470 | 1.0484 | 152.6757 | Ca2-1 | 2.408 | 17.186 | 1.625 | 1.0551 | 170.7395 |
|         |       |        |       |        |          |       |        |       |        |          | Na2-2 | 2.483 | 18.909 | 2.021 | 1.0525 | 166.6039 |
|         |       |        |       |        |          |       |        |       |        |          | Na2-3 | 2.511 | 19.833 | 1.613 | 1.0425 | 144.5774 |
|         |       |        |       |        |          |       |        |       |        |          | Na2-4 | 2.485 | 19.046 | 1.959 | 1.0498 | 159.9986 |

**Table S22.** Calculated geometrical parameters for tetrahedra and polyhedra in the crystal structure of the simulated model of hypothetical  $\text{CaZrSi}_6\text{O}_{15} \cdot 2\text{H}_2\text{O}$  elpidite. ABL—average bond length;  $P_{\text{vol}}$ —polyhedral volume; BLD—bond length distortion [22], TAV—tetrahedral angle variance [23], TQE—tetrahedral quadratic elongation [23].

| Atom  | ABL   | P <sub>vol</sub> | BLD   | TQE/<br>OQE | TAV/<br>OAV | ABL   | P <sub>vol</sub> | BLD   | TQE/<br>OQE | TAV/<br>OAV | Atom   | ABL   | P <sub>vol</sub> | BLD    | TQE/<br>OQE | TAV/<br>OAV | Atom     |
|-------|-------|------------------|-------|-------------|-------------|-------|------------------|-------|-------------|-------------|--------|-------|------------------|--------|-------------|-------------|----------|
| Zr-1  | 2.087 | 12.016           | 1.827 | 1.0064      | 19.9858     | Si2-1 | 1.626            | 2.206 | 1.523       | 1.0010      | 3.0596 | Si3-1 | 1.624            | 2.193  | 0.651       | 1.0022      | 8.3915   |
| Zr-2  | 2.087 | 12.016           | 1.827 | 1.0064      | 19.9857     | Si2-2 | 1.626            | 2.206 | 1.523       | 1.0010      | 3.0595 | Si3-2 | 1.624            | 2.193  | 0.651       | 1.0022      | 8.3914   |
| Zr-3  | 2.087 | 12.016           | 1.827 | 1.0064      | 19.9857     | Si2-3 | 1.626            | 2.206 | 1.523       | 1.0010      | 3.0595 | Si3-3 | 1.624            | 2.193  | 0.651       | 1.0022      | 8.3914   |
| Zr-4  | 2.087 | 12.016           | 1.827 | 1.0064      | 19.9857     | Si2-4 | 1.626            | 2.206 | 1.523       | 1.0010      | 3.0596 | Si3-4 | 1.624            | 2.193  | 0.651       | 1.0022      | 8.3915   |
| Si1-1 | 1.624 | 2.193            | 0.650 | 1.0022      | 8.3938      | Si2-5 | 1.626            | 2.206 | 1.523       | 1.0010      | 3.0595 | Si3-5 | 1.624            | 2.193  | 0.651       | 1.0022      | 8.3914   |
| Si1-2 | 1.624 | 2.193            | 0.650 | 1.0022      | 8.3938      | Si2-6 | 1.626            | 2.206 | 1.523       | 1.0010      | 3.0597 | Si3-6 | 1.624            | 2.193  | 0.651       | 1.0022      | 8.3915   |
| Si1-3 | 1.624 | 2.193            | 0.650 | 1.0022      | 8.3939      | Si2-7 | 1.626            | 2.206 | 1.523       | 1.0010      | 3.0597 | Si3-7 | 1.624            | 2.193  | 0.651       | 1.022       | 8.3915   |
| Si1-4 | 1.624 | 2.193            | 0.650 | 1.0022      | 8.3938      | Si2-8 | 1.626            | 2.206 | 1.523       | 1.0010      | 3.0595 | Si3-8 | 1.624            | 2.193  | 0.651       | 1.0022      | 8.3914   |
| Si1-5 | 1.624 | 2.193            | 0.650 | 1.0022      | 8.3938      |       |                  |       |             |             |        | Ca2-1 | 2.396            | 16.972 | 1.302       | 1.0532      | 166.6241 |
| Si1-6 | 1.624 | 2.193            | 0.650 | 1.0022      | 8.3938      |       |                  |       |             |             |        | Ca2-2 | 2.396            | 16.972 | 1.302       | 1.0532      | 166.6241 |
| Si1-7 | 1.624 | 2.193            | 0.650 | 1.0022      | 8.3938      |       |                  |       |             |             |        | Ca2-3 | 2.396            | 16.972 | 1.302       | 1.0532      | 166.6238 |
| Si1-8 | 1.624 | 2.193            | 0.650 | 1.0022      | 8.3938      |       |                  |       |             |             |        | Ca2-4 | 2.396            | 16.972 | 1.302       | 1.0532      | 166.6238 |

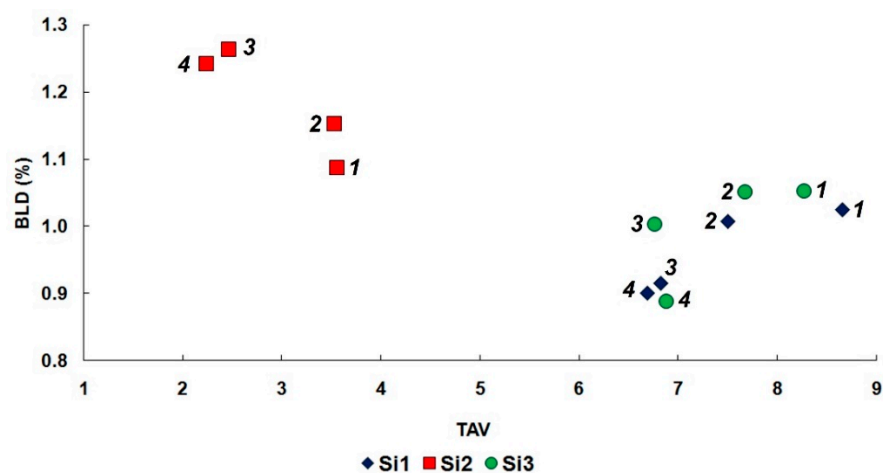

**Figure S1.** Bond length distortion (BLD) for tetrahedral of elpidite crystal structure against tetrahedral angle variance (TAV). 1 and 2 are EIB1 and EIB2–elpidite from Burpala (Russia); 3 and 4 are EIKhB1 and EIKhB2–elpidite from Khan-Bogdo (Mongolia).

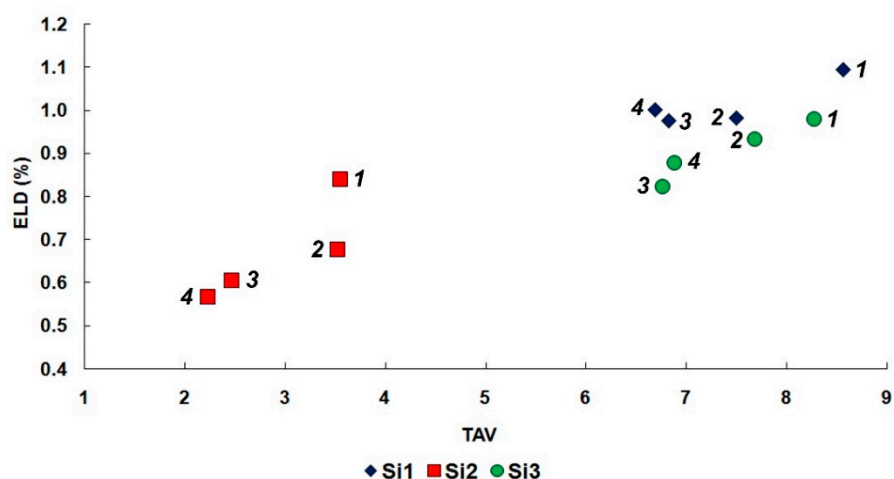

**Figure S2.** Edge length distortion (ELD) for tetrahedral of elpidite crystal structure against tetrahedral angle variance (TAV). 1 and 2 are EIB1 and EIB2–elpidite from Burpala (Russia); 3 and 4 are EIKhB1 and EIKhB2–elpidite from Khan-Bogdo (Mongolia).

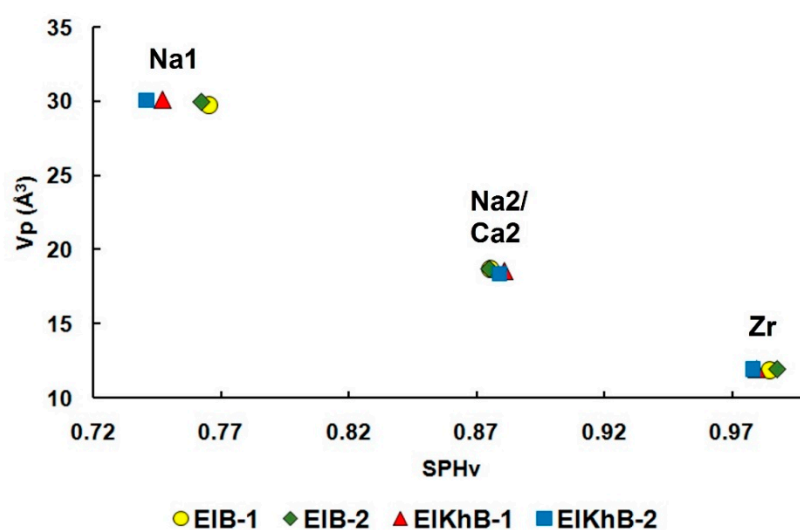

**Figure S3.** The volume of the coordination polyhedra ( $V_p$ ) of elpidite crystal structure against polyhedra volume sphericity (SPHv).

## References

1. Neronova, N.N.; Belov, N.V. Crystal structure of elpidite  $\text{Na}_2\text{ZrSi}_6\text{O}_{15} \cdot (\text{H}_2\text{O})_3$ . Dimorphism of the dimetasilicate radical  $\text{Si}_6\text{O}_{15}$ . *Dokl. Akad. Nauk SSSR*. 1963, 150, 642–645.
2. Neronova, N.N.; Belov, N.V. Crystal structure of elpidite,  $\text{Na}_2\text{ZrSi}_6\text{O}_{15} \cdot (\text{H}_2\text{O})_3$ . *Sov. Phys. Crystallogr.* 1964, 9, 700–705.
3. Chao, G.Y. Leucophanite, elpidite, narsarsukite from the Desourdy quarry, Mont St. Hilaire, Quebec. *Can. Min.* 1967, 9, 286–287.
4. Cannillo, E.; Rossi, G.; Ungaretti, L. The crystal structure of elpidite. *Am. Mineral. J. Earth Planet. Mater.* 1973, 58, 106–109.
5. Sapozhnikov, A.N.; Kashaev, A.A. Features of the crystal structure of calcium-containing elpidite. *Sov. Phys. Crystallogr.* 1978, 23, 24–27.
6. Zubkova, N.V.; Ksenofontov, D.A.; Kabalov, Y.K.; Chukanov, N.V.; Nedel'ko, V.V. Dehydration-induced structural transformations of the microporous zirconosilicate elpidite. *Inorg. Mater.* 2011, 47, 506–512. doi.org/10.1134/S0020168511050232.
7. Grigor'Eva, A.A.; Zubkova, N.V.; Pekov, I.V.; Kolitsch, U.; Pushcharovsky, D.Y.; Vigasina, M.F.; Giester, G.; Dordevic, T.; Tillmanns, E.; Chukanov, N.V. Crystal chemistry of elpidite from Khan Bogdo (Mongolia) and its K- and Rb-exchanged forms. *Crystallogr. Rep.* 2011, 56, 832–841, doi:10.1134/s1063774511050117.
8. Seryotkin, Y.V.; Bakakin, V.V.; Pekov, I.V. Structural evolution of microporous zirconosilicate elpidite under high pressure. *J. Struct. Chem.* 2014, 55, 1252–1259, doi:10.1134/s0022476614070087.
9. Grice, J.D.; Rowe, R.; Poirier, G. Hydroterskite: A New Mineral Species From the Saint-Amable Sill, Quebec, and A Comparison With Terskite and Elpidite. *Can. Miner.* 2015, 53, 821–832, doi:10.3749/canmin.1400105.
10. Cametti, G.; Armbruster, T.; Nagashima, M. Dehydration and thermal stability of elpidite: An in-situ single crystal X-ray diffraction study. *Microporous Mesoporous Mater.* 2016, 227, 81–87, doi:10.1016/j.micromeso.2016.02.049.
11. Zubkova, N.V.; Nikolova, R.P.; Chukanov, N.V.; Kostov-Kytin, V.V.; Pekov, I.V.; Varlamov, D.A.; Larikova, T.S.; Kazheva, O.N.; Chervonnaya, N.A.; Shilov, G.V.; et al. Crystal Chemistry and Properties of Elpidite and Its Ag-Exchanged Forms. *Miner.* 2019, 9, 420, doi:10.3390/min9070420.
12. Kostov-Kytin, V.V.; Kerestvedjian, T.N. Rietveld Analysis of Elpidite Framework Flexibility Using in Situ Powder XRD Data of Thermally Treated Samples. *Miner.* 2020, 10, 639, doi:10.3390/min10070639.
13. Zubkova, N.V.; Pekov, I.V.; Chukanov, N.V.; Yapaskurt, V.O.; Turchkova, A.G.; Larikova, T.S.; Pushcharovsky, D.Y. A highly hydrated variety of elpidite from the Khibiny alkaline complex, Kola Peninsula, Russia. *Miner. Mag.* 2020, 1–7, doi:10.1180/mgm.2020.96.
14. Gagné, O.C.; Hawthorne, F.C. Comprehensive derivation of bond-valence parameters for ion pairs involving oxygen. *Acta Crystallogr. Sect. B Struct. Sci. Cryst. Eng. Mater.* 2015, 71, 562–578, doi:10.1107/s2052520615016297.
15. Hoppe, R. Effective coordination numbers (ECoN) and mean fictive ionic radii (MEFIR). *Z. für Kristallogr.* 1979, 150, 23–52. doi.org/10.1524/zkri.1979.150.14.23.
16. Hoppe, R.; Voigt, S.; Glaum, H.; Kissel, J.; Müller, H.P.; Bernert, K. A new route to charge distributions in ionic solids. *J. Less Common Met.* 1989, 156, 105–122, doi:10.1016/0022-5088(89)90411-6.
17. Nespolo, M.; Ferraris, G.; Ohashi, H. Charge distribution as a tool to investigate structural details: meaning and application to pyroxenes. *Acta Crystallogr. Sect. B Struct. Sci.* 1999, 55, 902–916, doi:10.1107/s0108768199008708.
18. Momma, K.; Izumi, F. VESTA 3 for three-dimensional visualization of crystal, volumetric and morphology data. *J. Appl. Crystallogr.* 2011, 44, 1272–1276, doi:10.1107/s0021889811038970.



- 
19. Žunić, T.B.; Makovicky, E. Determination of the centroid or 'the best centre' of a coordination polyhedron. *Acta Crystallogr. Sect. B Struct. Sci.* **1996**, *52*, 78–81, doi:10.1107/s0108768195008251.
  20. Balić-Žunić, T.; Vicković, I. IVTON – program for the calculation of geometrical aspects of crystal structures and some crystal chemical applications. *J. Appl. Cryst.* **1996**, *29*, 305–306. doi.org/10.1107/S0021889895015081.
  21. Makovicky, E.; Balić-Žunić, T. New measure of distortion for coordination polyhedra. *Acta Crystallogr.* **1998**, *B54*, 766–773. doi.org/10.1107/S0108768198003905.
  22. Renner, B.; Lehmann, G. Correlation of angular and bond length distortions in TO<sub>4</sub> units in crystals. *Z. für Kristallogr.* **1986**, *175*, 43–59 (1986). doi.org/10.1524/zkri.1986.175.1-2.43.
  23. Robinson, K.; Gibbs, G.V.; Ribbe, P.H. Quadratic elongation: A quantitative measure of distortion in coordination polyhedra. *Science*. **1971**, *172*, 567–570. doi.org/10.1126/science.172.3983.567.
  24. Chukanov, N.V. *Infrared spectra of mineral species*. Springer, Dordrecht, 2014. doi.org/10.1007/978-94-007-7128-4.
